# Supplementary material
Source: bioRxiv or medRxiv preprint supplement (https://www.biorxiv.org/highwire/filestream/85910/field_highwire_adjunct_files/0/278903-1.pdf)
Supplement: Supplementary file [file 278903-1.pdf]

## Supplementary Material for:

### Proteome-level assessment of origin, prevalence and function of Leucine-Aspartic Acid (LD) motifs

Tanvir Alam<sup>1,2,#</sup>, Meshari Alazmi<sup>1,2,#</sup>, Rayan Naser<sup>1,3,#</sup>, Franceline Huser<sup>1,3,#</sup>, Afaq A. Momin<sup>1,3,#</sup>, Katarzyna W. Walkiewicz<sup>1,3,5</sup>, Christian G. Canlas<sup>4</sup>, Raphaël G. Huser<sup>2</sup>, Amal J. Ali<sup>3</sup>, Jasmeen Merzaban<sup>3</sup>, Vladimir B. Bajic<sup>1,2,\*</sup>, Xin Gao<sup>1,2,\*</sup>, Stefan T. Arold<sup>1,3,\*</sup>

King Abdullah University of Science and Technology (KAUST), Thuwal, Saudi Arabia

1. Computational Bioscience Research Center (CBRC);
2. Division of Computer, Electrical and Mathematical Sciences & Engineering (CEMSE);
3. Division of Biological and Environmental Sciences and Engineering (BESE);
4. Imaging and Characterization Core Lab
5. Current address: NanoTemper Technologies GmbH, Floessergasse 4, Munich, Germany

\* Correspondence should be sent to STA: [stefan.arold@kaust.edu.sa](mailto:stefan.arold@kaust.edu.sa) or XG: [xin.gao@kaust.edu.sa](mailto:xin.gao@kaust.edu.sa) or VBB: [vladimir.bajic@kaust.edu.sa](mailto:vladimir.bajic@kaust.edu.sa)

# Contributed equally

#### Short Title:

Proteome-wide prediction and function of LD motifs

#### KEYWORDS

focal adhesion; protein-ligand interaction; nuclear export signal; machine-learning; evolution

# Supplementary Figure 1

Disorder predictions for the *bona fide* LD motifs, established by MetaPrDos. The 2-state prediction shows residues predicted to be disordered in red. These red residues correspond to sequence positions with a disorder tendency above 0.5 in the disorder profile plot.

## 1 Paxillin

**PREDICTION RESULT: P49024-pax-chick**

Prediction false positive rate: 5.0%

2-state prediction

(Red: Disordered residues Black: Ordered residues)

|     |            |             |            |            |             |     |
|-----|------------|-------------|------------|------------|-------------|-----|
| 1   | MDDLALLAD  | LESTTSHISK  | RPVFLTEETP | YSYPTGNHTY | QEIAVPPFPV  | 90  |
| 51  | PPPSSEALNG | TVIDPLDQWQ  | FSVSRYGHQQ | PQSQSPIYSS | SAKSSSSASVP | 100 |
| 101 | RDGLSSPSR  | ASEEEHVYSF  | PNKQKSAEPS | FTMTSTSLGS | NLSELDRLLL  | 150 |
| 151 | ELNAVQHNP  | SGFSADEVSR  | SPSLPNVTGP | HYVIPSSSSS | AGGKAAPPTK  | 200 |
| 201 | EKPKRNGGRG | IEDVRPVSVE  | LLDELESSVP | SPVPAITVSQ | GEVSSPQVRN  | 250 |
| 251 | ASQQQTRISA | SSATRELEDEL | MASLSDFKFM | AQKGAGSSSS | PPSTTPKPGS  | 300 |
| 301 | QLDTMLGSLQ | SDLNKLGVAT  | VARGVCGACK | KPIAGQVVTA | MGKT        | 350 |

Disorder profile plot

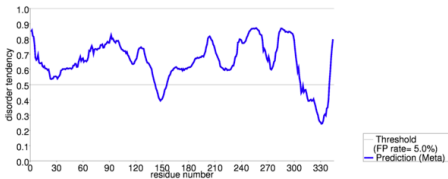

## 2 Hic-5 protein

**PREDICTION RESULT: hic-5**

Prediction false positive rate: 5.0%

2-state prediction

(Red: Disordered residues Black: Ordered residues)

|     |            |            |            |            |            |     |
|-----|------------|------------|------------|------------|------------|-----|
| 1   | MEDLDALLAD | LQITTPFRCP | VLLTDSPEKP | QPTETRPPPP | PYDEKTAMSN | 90  |
| 51  | KTSDHETFPV | DKDHLYSIVQ | KYPLFSVSPA | LGGGLCELDL | LLNELNATQF | 100 |
| 101 | NITDEIMSQF | PTRDPSEQKA | EAQKEAEKRA | LSASSATLEL | DRIMASLSDF | 150 |
| 151 | HKQNTVSQEV | EAPGAYKGSE | EVSRRPGTDE | LSSPRSTACV | PKDLEDAPTP | 200 |
| 201 | KSPKVVSAAG | HLEVKTQNVN | SDEVTSASRP | DSVSGSKVPE | ATSVPRSDLD | 250 |
| 251 | SMLVKLQSG  | KQQGIETYSK | GLCESQRP   | AGQVVTA    | LGH T      | 300 |

Disorder profile plot

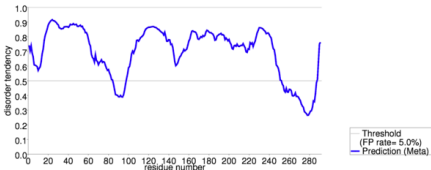

3    DLC1

2-state prediction

(Red: Disordered residues Black: Ordered residues)

|     |            |            |            |            |            |     |
|-----|------------|------------|------------|------------|------------|-----|
| 1   | NSTQTSSSSS | QSETSSAVST | PSPVTTRSL  | STCNKRVGMY | LEGFDFFSQS | 50  |
| 51  | TLNNVTEQNY | KNRESYPEDT | VFYIPEDHKP | GTFFKALSHG | SFCPSGNSSV | 100 |
| 101 | NWRTGSFHGP | GHLSLRRENS | HDSPKELKRR | NSSSSLSSRL | SIYDNVPGSI | 150 |
| 151 | LYSSSGELAD | LENEDIFPEL | DDILYHVKGM | QRIVNQWSEK | FDEGDSDSA  | 200 |
| 201 | LDSVSPCPSS | FKQIHLVDH  | DRRTPSDLDS | TGNSLNEFEE | PTDIPERRDS | 250 |
| 251 | GVGASLTRCN | RHRLRWHSFQ | SSHRPSLSNV | SLQINCQSV  | QMNLQKQYSL | 300 |
| 301 | LKLTALLEKY | TPSNKHGFSW | AVPKFMKRIK | VPDYKDRSVF | GVPLTVNVQR | 350 |
| 351 | SCQPLPQSIQ |            |            |            |            | 400 |

Disorder profile plot

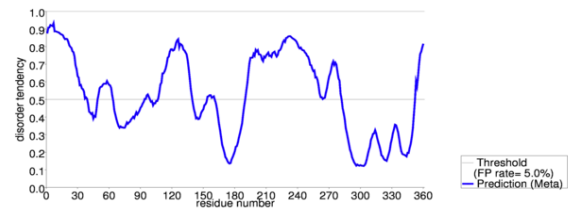

4    Roxan

PREDICTION RESULT: roxan

Prediction false positive rate: 5.0%

2-state prediction

(Red: Disordered residues Black: Ordered residues)

|     |             |            |            |            |            |     |
|-----|-------------|------------|------------|------------|------------|-----|
| 1   | SLLSNGTAAG  | VADQGTSNGL | GSIDDIETGN | VPDTREQVEI | GAPRDCYVDP | 50  |
| 51  | RGSPALLEST  | PTMPLFFHVL | DLLAPLDSSR | TLPSTDSLDD | FSDGDVFGPE | 100 |
| 101 | LDTLILDSLSL | VQGLSGSGV  | PSELPLQIPV | FPGTPLLFP  | VVGGSIPVSS | 150 |
| 151 | PLPPASFGLV  | MDPSKKLAAS | VLDALDPFPG | TLDPLDLLFY | SETRLDALDS | 200 |
| 201 | FGSTRGSLDK  | PDSFMEETNS | QDHRPPSGAQ | KPAPSPEPCM | PNTALLIKNP | 250 |
| 251 | LAATHEFKQA  | CQLCYPKTGP | RAGDITYREG | LEHKCKRDIL | LGRLRSSDQ  | 300 |

Disorder profile plot

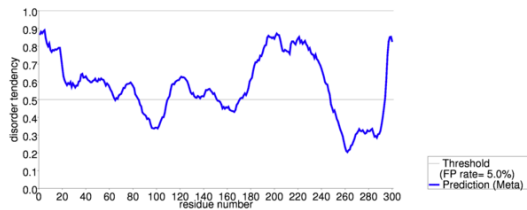

## 5 E6BP

### PREDICTION RESULT: Q05086-E6ap

Prediction false positive rate: 5.0% [Change FP rate](#)

#### 2-state prediction

(Red: Disordered residues Black: Ordered residues)

|     |            |            |            |            |             |     |
|-----|------------|------------|------------|------------|-------------|-----|
| 1   | RVYTRLISNE | KIETAFLNAL | VYLSPNVECD | LTYNHVYSRD | PNYLNLFIIIV | 50  |
| 51  | MENRNLSHPE | YLEMALPLFC | KAMSKLPLAA | QGKLIRLWSK | YNADQIRRMQ  | 100 |
| 101 | ETFQQLITYK | VISNEFNRSN | LVNDDAIVA  | ASKCLRMVYY | ANVVGGEVDT  | 150 |
| 151 | NHNEEDDEEP | IPESSELTLQ | ELLGEERRNK | KGPRVDFLET | ELGVKTLDGR  | 200 |
| 201 | KPLIFFEETI | NEPLNEVLEM | DKDYTFKVE  | TENKFSFMTG | PFILNAVTKN  | 250 |
| 251 | LGLYYDNRIK | MYSERRITVL | YSLVQGQQLN | PYLRLKVRDR | HIIDDALVRL  | 300 |
| 301 | EMIAMENPAD | LKKQLYVEFE | GEQGVDEGGV | SKEFFQLVVE | EIFNPDIGMF  | 350 |
| 351 | TYDESTKLFW |            |            |            |             | 400 |

#### Disorder profile plot

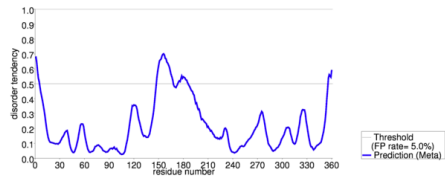

## 6 E6BP/ERC-55

### PREDICTION RESULT: Q14257-Erc55

Prediction false positive rate: 5.0% [Change FP rate](#)

#### 2-state prediction

(Red: Disordered residues Black: Ordered residues)

|     |            |            |            |            |             |     |
|-----|------------|------------|------------|------------|-------------|-----|
| 1   | MRLGPRTAAL | GLLLCAAAA  | GAGKAELHY  | PLGERRSDDY | REALLGVQED  | 50  |
| 51  | VDEYVKLGHE | EQQKRLQAI  | KKIDLSDGF  | LTESELSSWI | QMSFKHYAMQ  | 100 |
| 101 | EAKQQFVEYD | KNSDDTVTWD | EYNIQMYDRV | IDFDENTALD | DAEEESFRKL  | 150 |
| 151 | HLKDKKRFEK | ANQDSGPGLS | LEEFIAFEHP | EEVDYMTFV  | IQEALAEHDK  | 200 |
| 201 | NGDGFVSLEE | FLGDYRNDPT | ANEDPEWILV | EKDRFVNDYD | KDNDGRLDPO  | 250 |
| 251 | ELLFWVVPNN | QGIAQEEALH | LIDEMDLNGD | KKLSEEEILE | NPDLFILTSEA | 300 |
| 301 | TDYGRQLHDD | YFYHDEL    |            |            |             | 350 |

#### Disorder profile plot

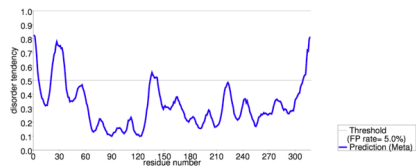



## 7 Gelsolin (mouse)

### PREDICTION RESULT: P06396-gelsolin

Prediction false positive rate: 5.0%

#### 2-state prediction

(Red: Disordered residues Black: Ordered residues)

|     |        |        |           |            |            |            |     |
|-----|--------|--------|-----------|------------|------------|------------|-----|
| 1   | RHGG   | RQGQII | YNWGAQSTQ | DEVAASAILT | AQDDEELGGT | PVQSRVVQVK | 50  |
| 51  | EPAHLM | SLFG   | GRPMI     | IKGG       | TSREGGQTAP | ASTRLFQVRA | 100 |
| 101 | VLPKAG | ALNS   | NDAFV     | LKTPS      | AAYLWVG    | TGA        | 150 |
| 151 | QVAEG  | SEPDG  | FWALG     | GKAA       | YRTSP      | RLKDK      | 200 |
| 201 | IEEV   | PGELMQ | EDLAT     | DDVML      | LDTWD      | QVFVM      | 250 |
| 251 | IETD   | PANRDR | RTPTV     | VVKQG      | FEPPS      | FVGNF      | 300 |
| 301 | AA     |        |           |            |            |            | 350 |

Disorder profile plot

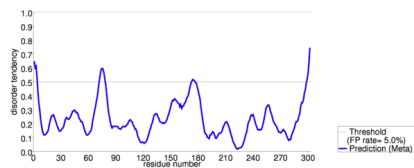

## 8 CD4

### PREDICTION RESULT: P01730-CD4

Prediction false positive rate: 5.0%

#### 2-state prediction

(Red: Disordered residues Black: Ordered residues)

|   |       |       |       |       |      |        |      |       |    |
|---|-------|-------|-------|-------|------|--------|------|-------|----|
| 1 | CVRCR | HRRRQ | AERMS | QIKRL | LSEK | KTCQCP | HRFQ | KCSPI | 50 |
|---|-------|-------|-------|-------|------|--------|------|-------|----|

Disorder profile plot

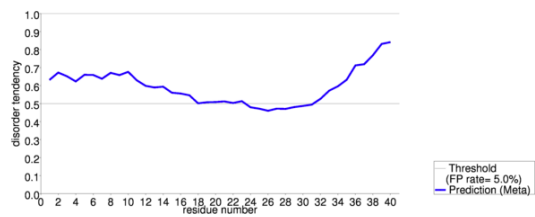

## Supplementary Figure 2

Computational assessment of the structural context of E6BP and of the potential LD motifs proposed by Brown et al. (*Nature Structural Biology*, 1998)

Homology models are coloured according to their secondary structure (magenta:  $\alpha$ -helix; cyan:  $\beta$ -strands). The putative LD motif is colored in green, with the LD motif positions 0, 3 and 4 (L<sup>0</sup>XXLL) colored in red.

MetaPrDos (<http://prdos.hgc.jp/>) was used for predicting structural order/disorder from the protein sequence. PHOBIUS (<http://phobius.sbc.su.se/>) was used for prediction of transmembrane helices and signal peptides.

The structural analysis was carried out using the PHYRE2 (<http://www.sbg.bio.ic.ac.uk/phyre2/>), SWISS-MODEL (<http://swissmodel.expasy.org/>) and RaptorX (<http://raptorx.uchicago.edu/>) servers.

## Supplementary Figure 2.1. Summary Table

|                                                            | UNIPROT Entry               | Motif sequence and location in protein | Sequence identity of 3D templates for suggested LD motif region |
|------------------------------------------------------------|-----------------------------|----------------------------------------|-----------------------------------------------------------------|
| <b>E6BP / ERC-55</b>                                       |                             |                                        |                                                                 |
|                                                            | Q14257; E6BP                | 208-LEEFLGDYR-216                      | 17-21 % identical                                               |
| <b>Previously suggested (Brown et al. <i>NSB</i> 1998)</b> |                             |                                        |                                                                 |
| 1                                                          | P09104; $\gamma$ -Enolase   | 90-LDNLMLEL-97                         | 100 % identical; *                                              |
| 2                                                          | P05937; Calbindin           | 211-LDALLKDL-218                       | 98 % identical; *                                               |
| 3                                                          | P29376; LTK                 | 556-LDFLMEAL-563                       | 77 % identical; *                                               |
| 4                                                          | P10911; DBL                 | 662-LDAML DLL-669                      | 65 % identical; *                                               |
| 5                                                          | P22676; Calretinin          | 220-LDALLKDI-227                       | 59 % identical; *                                               |
| 6                                                          | P55039; DRG                 | 276-LDYLLEML-283                       | 55 % identical; *                                               |
| 7                                                          | P29461; PTP2                | 679-LDFLLSIL-686                       | 42 % identical; *                                               |
| 8                                                          | P36010; $\beta$ -Adaptin    | 409-LDILLELL-416                       | 40 % identity; *                                                |
| 9                                                          | P40421; RDGC                | 163-LDDLLVVL-170                       | 40 % identical; *                                               |
| 10                                                         | P38570; Integrin $\alpha$ E | 375-LDGLLSKL-382                       | 38 % identical; *                                               |
| 11                                                         | P52306; RAP1 GDS            | 27-LDCLLQAL-34                         | 24 % identical                                                  |
| 12                                                         | P53046; Rho1 GEF            | 713-LDNMLLFL-720                       | 24 % identical; *                                               |
| 13                                                         | P35579; Myosin HC           | 1422-LDDLLVDL-1429                     | 17 % identical; coiled-coil                                     |
| 14                                                         | P24216; Hap2                | 443-LDVLM TS-450                       | 13 % / 43 % identical (depending on fragment length); *         |
| 15                                                         | P54762; Eph-2               | 3-LDYLLLLL-10                          | Signal peptide; no 3D template                                  |
| 16                                                         | P38650; Dynein HC           | 1361-LDGLLNQL-1368                     | No template                                                     |
| 17                                                         | P51592; E3                  | 1453-LDTLLLT L-1460                    | No template                                                     |
| 18                                                         | Q04205; tensin              | 807-LDVLM L DL-814                     | No template                                                     |

### Legend:

\*: available in the Protein Model Portal [www.proteinmodelportal.org](http://www.proteinmodelportal.org).

*No shading*: proteins where 3D models can be established with good confidence, showing that their LD motifs are implicate in a 3D fold and hence inaccessible for canonical LD motif interactions.

**Yellow shaded molecules**: no high-quality model exists, but either low-identity structural homology or other functionality make an LD-motif function unlikely.

**Green shading**: no 3D model is available, and strong biological assumptions to rule out LD-motif function are lacking. However, known biological function speak against it, and the motif is highly degenerate.

**Red shading**: this motif is potentially likely to be a bona fide LD motif, because of its structural characteristics and supporting biological evidence.

## Supplementary Figure 2.2: Details for E6BP

### Q14257; E6BP / ERC-55

Location in protein: 208-LEEFLGDYR-216

Structural Information: 17-21 % sequence identity with EF-hand proteins. Shown is a model built based on PDB 3evv.

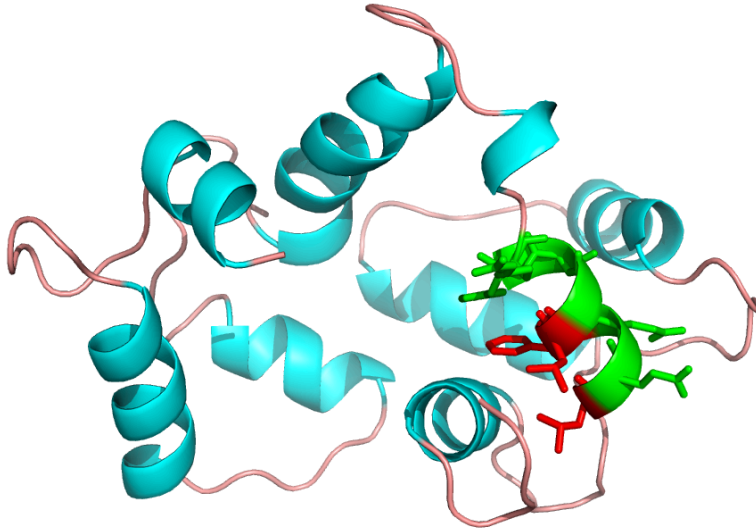

## Supplementary Figure 2.3: Details for the 18 LD motifs suggested by Brown et al. (1998)

### 1 P09104; GAMMA ENOLASE; ENO2

---

Location in protein: 90-LDNLMLEL-97

Structural Information: 100% Sequence Identity with PDB 2akm. The suggested LD motif is part of the catalytic domain.

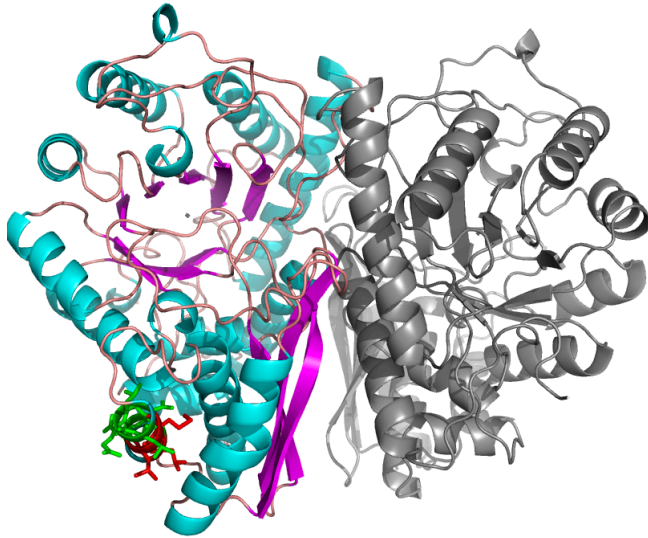

### 2 P05937; CALBINDIN

---

Location in protein: 211-LDALLKDL-218

Structural Information: 98% Sequence Identity with PDB Template 2f33A. Forms EF-hand helix-turn-helix

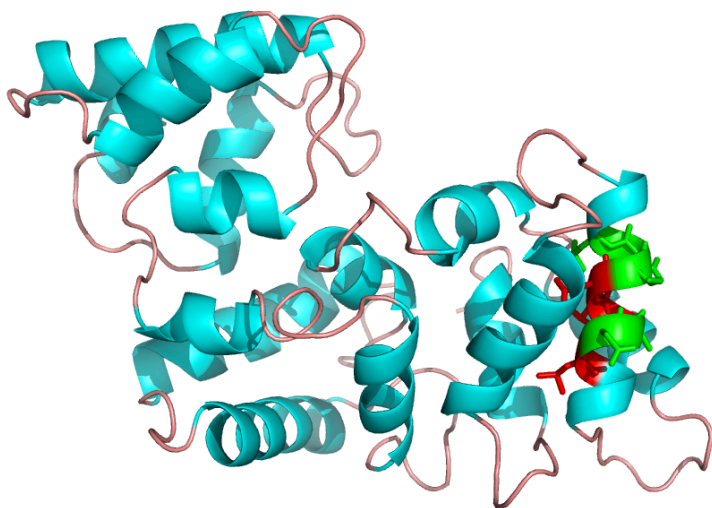

### 3 P29376; LTK

---

Location in protein: 556-LDFLMEAL-563

Structural Information: 77% Sequence Identity with PDB 3ics. The LD motif is situated in the  $\alpha$ C helix of the protein kinase domain.

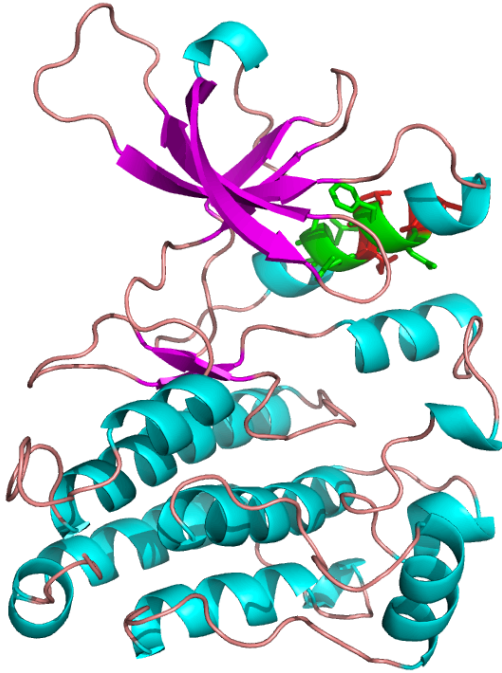

### 4 P10911; DBL

---

Location in protein: 662-LDAMLDLL-669

Structural Information: 65 % sequence identity with dbl-homology domain (DH domain);

Template PDB 1kz7

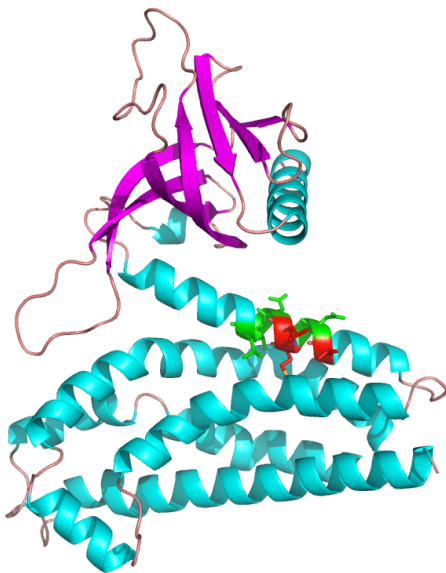

## 5 P22676; CALRETININ; CAB29

---

Location in protein: 220-LDALLKDI-227

Structural Information: 59 % sequence identity with PDB 2f33; forms EF-hand helix-turn-helix.

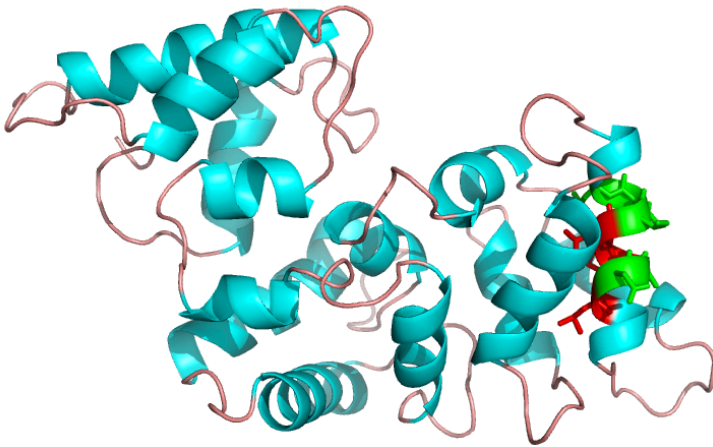

## 6 P55039; DRG

---

Location in protein: 276-LDYLLLEML-283

Structural Information: 55% sequence identity with PDB 4a9a

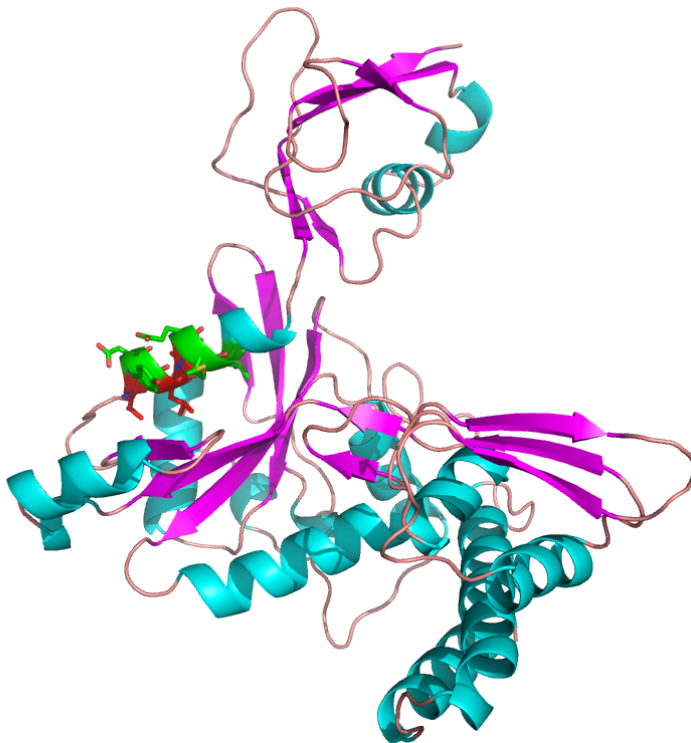

## 7 P29461; PTP2

---

Location in protein: 679-LDFLLSIL-686

Structural Information: 23.7% Sequence Identity with PDB 3oc3A and 42% identical with 2cfv in the PTP domain.

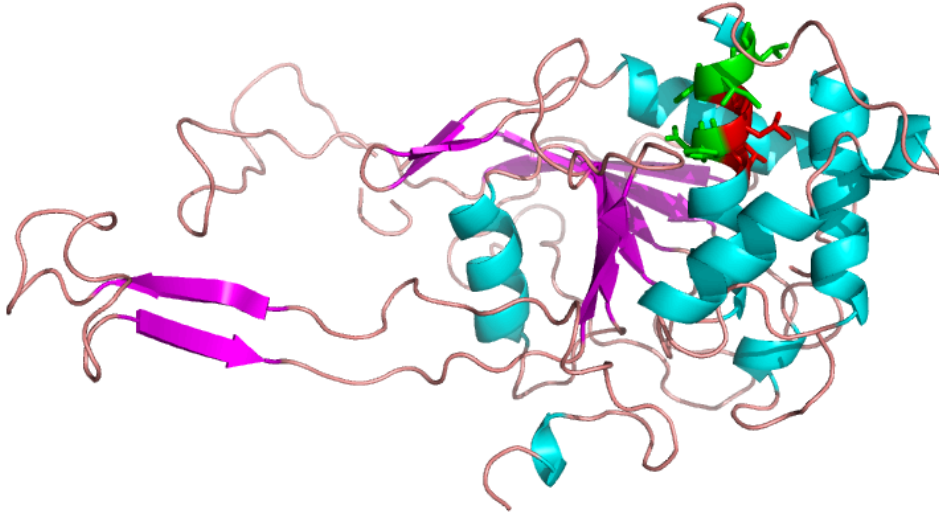

## 8 P36000; $\beta$ -ADAPTIN

---

Location in protein: 409-LDILLELL-416

Structural Information: 40 % Sequence Identity to 4uqi.

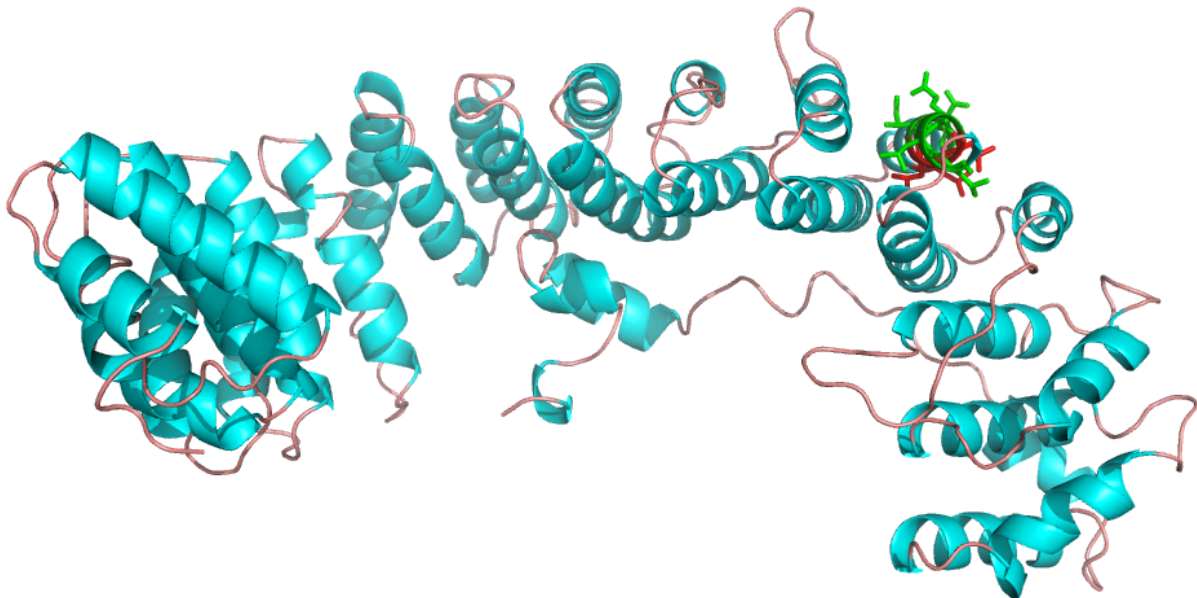



## 9 P40421; RDGC

---

Location in protein: 163-LDDLLVVL-170

Structural Information: 40 % sequence identity with PDB 5jjaA; LD motif is inaccessible in the catalytic region

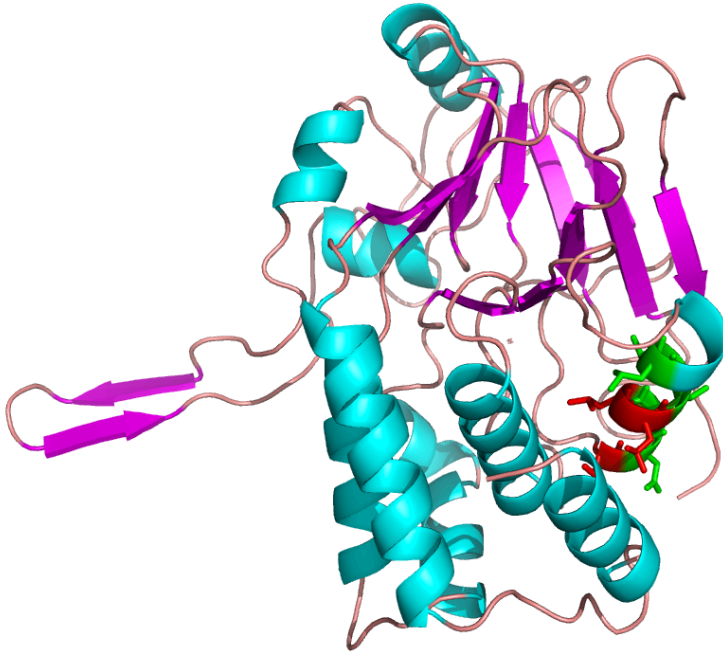

## 10 P38570; Integrin alpha-E; ITGAE

---

Location in protein: 375-LDGLLSKL-382

Structural Information: 38% sequence identity with PDB 1na4 in VWFA domain

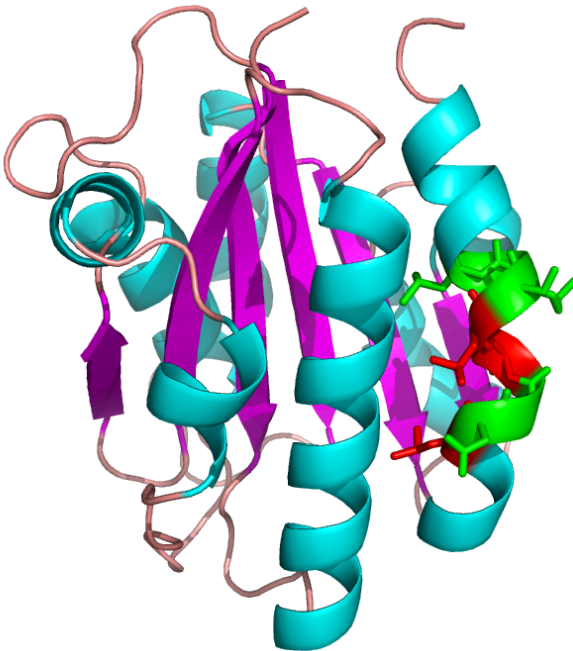

## 11 P52306; RAP1 GTPase DISSOCIATION STIMULATOR 1; RAP1GDS

---

Location in protein: 27-LDCLLQAL-34

Structural Information: 24.2% sequence identity with PDB 4hxt in ARM repeat.

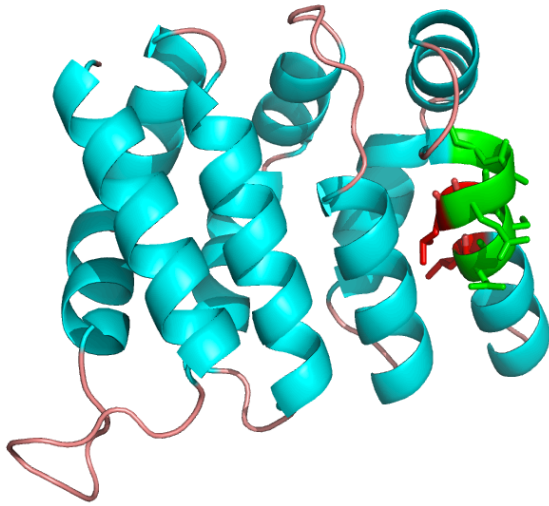

## 12 P53046; RHO1 GDP-GTP exchange protein 1; ROM1

---

Location in protein: 713-LDNMLLFL-720

Structural Information: 17.7% identical with PDB 3kz1 (pictured) or 24% identical with PH domain only of 1xcgA;

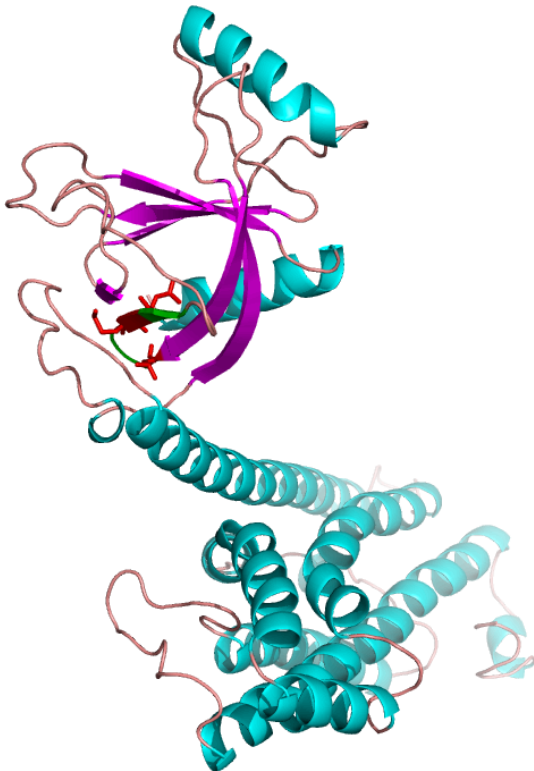

### 13 P35579; MYOSIN-9; MYH9

Location in protein: 1422-LDDLLVDL-1429

Structural Information: 17% sequence identity to PDB entry 2efr (tropomyosin) in C-terminal coiled-coil region

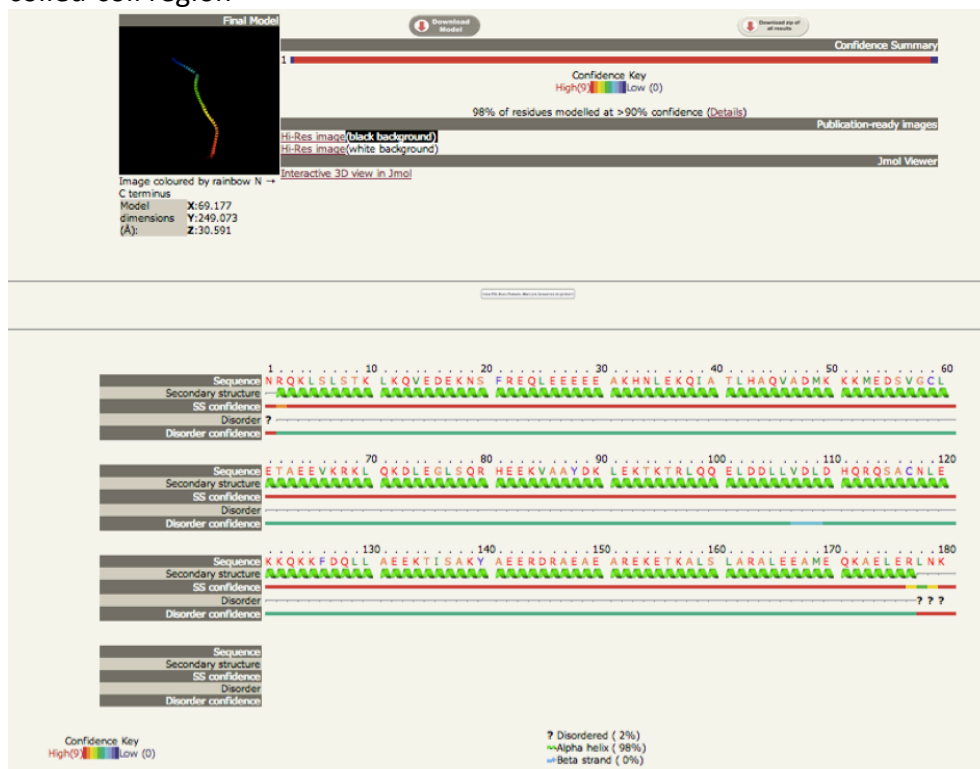

14 P24216; HAP2

Location in protein: 443-LDVLMTS-450  
Structural Information: 43 % identity with PDB 5krw for residues 385-461, but poor model quality. 13% sequence identify with PDB entry 1gk4 (88.8% confidence in phyre2 for the coiled-coil domain), similar to human vimentin coil 2b fragment

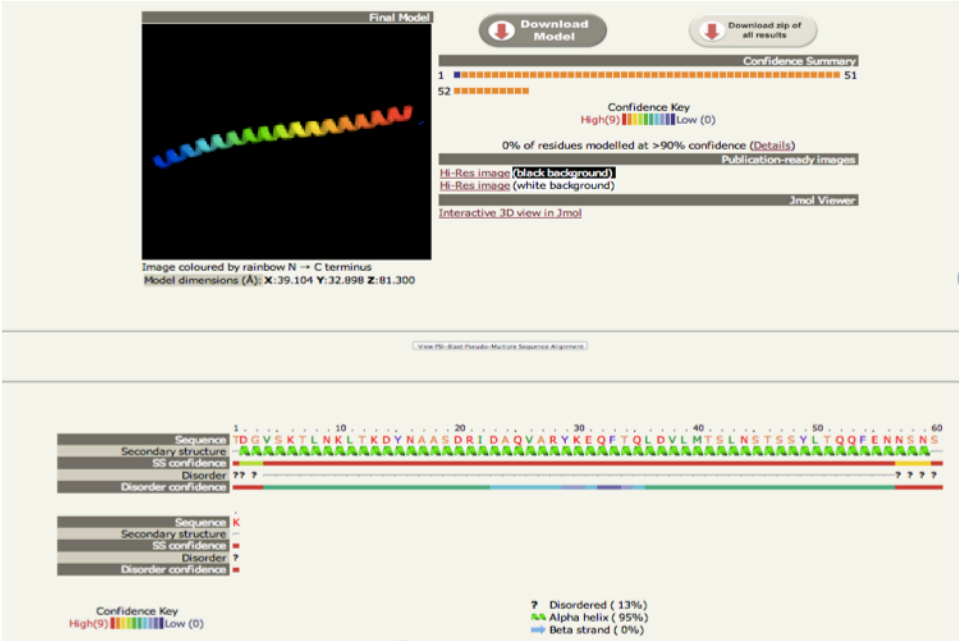

15 P54762; Ephrin type-B receptor 1;EphB1

Location in protein: 3-LDYLLLLL-10  
Structural Information: No structure modelling possible for this region. The region is identified as an extracellular signaling peptide (cleaved during maturation) by Phobius (below).

|    |          |     |     |
|----|----------|-----|-----|
| ID | Ephrin   |     |     |
| FT | SIGNAL   | 1   | 17  |
| FT | REGION   | 1   | 1   |
| FT | REGION   | 2   | 12  |
| FT | REGION   | 13  | 17  |
| FT | TOPO_DOM | 18  | 540 |
| FT | TRANSMEM | 541 | 563 |
| FT | TOPO_DOM | 564 | 984 |
| FT |          |     |     |
| FT |          |     |     |

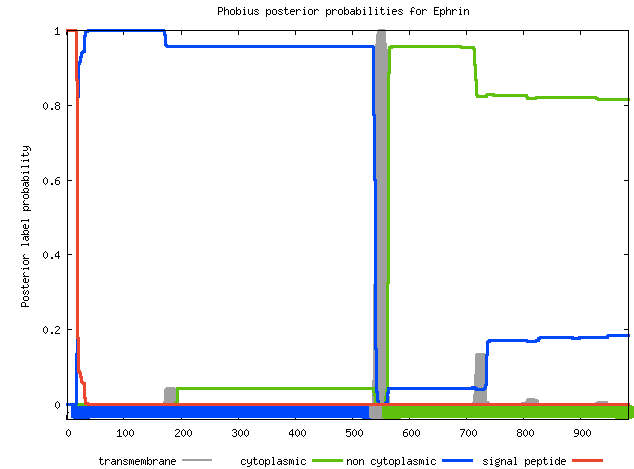

16 P38650; CYTOPLASMIC DYNEIN 1 HEAVY CHAIN 1; DYNC1H1

Location in protein: 1361-LDGLLNQL-1368

Structural Information: No homology model possible. The LD motif is found in the coiled-coil STEM region

PREDICTION RESULT: P38650

Prediction false positive rate: 5.0% Change FP rate

2-state prediction

(Red: Disordered residues Black: Ordered residues)

|     |            |            |            |            |            |     |
|-----|------------|------------|------------|------------|------------|-----|
| 1   | KTKPVTGNLR | PEEALQALTI | YEGKFGRLLD | DREKCAKAKE | ALELTDTGLL | 50  |
| 51  | SGSEERVQVA | LEELQDLKGV | WSELKVVWEQ | IDQMKEQPWW | SVQPRKLRQN | 100 |
| 101 | LDGLLNQLKN | FPARLRQYAS | YEFVQRLKLG | YMKINMLVIE | LKSEALKDRH | 150 |
| 151 | WKQLMKRLHV | NWVSELTLG  | QIWDVLDQKN |            |            | 200 |

Disorder profile plot

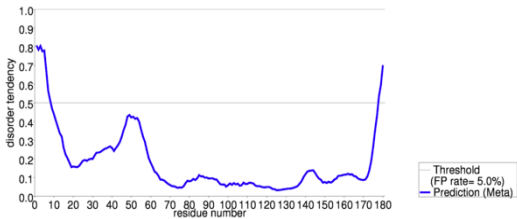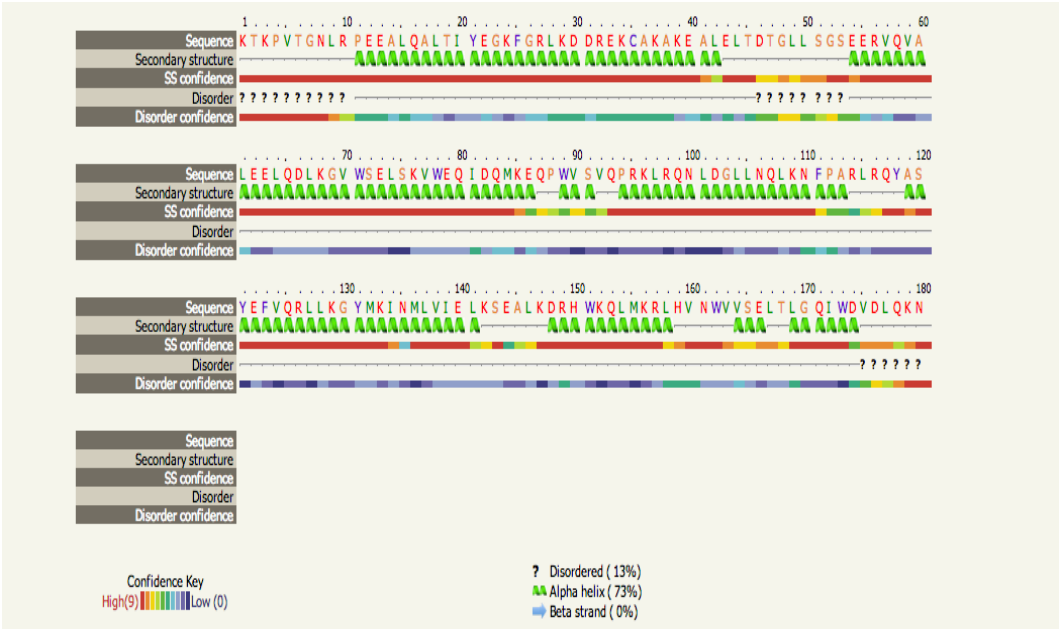

## 17 P51592; E3 UBIQUITIN-PROTEIN LIGASE; HYD

Location in protein: 1453-LDTLLLT-1460

Structural Information: No homologous structure for modelling.

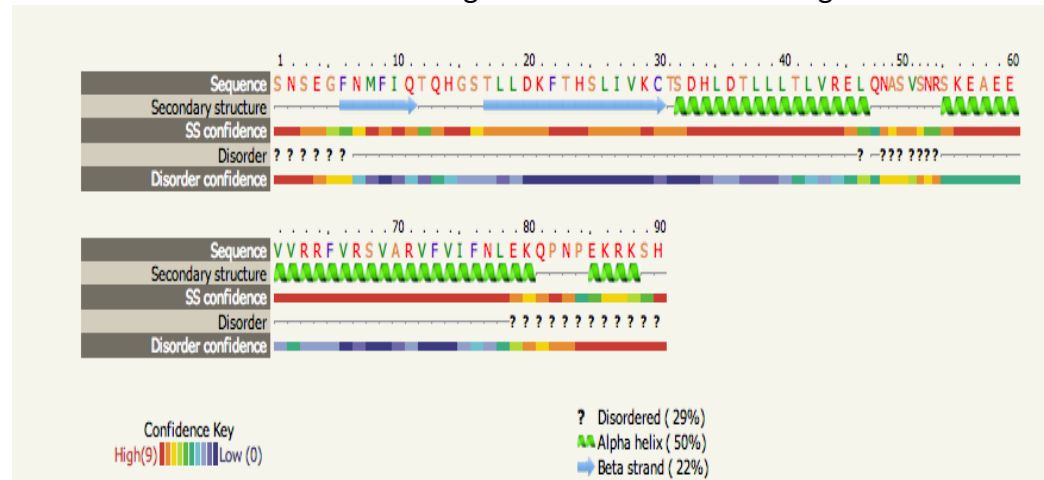

## 18 Q04205; TENSIN; TNS

Location in protein: 807-LDVLMIDL-814

Structural Information: No 3D template is available. This motif is promising, because an interaction between the homologue tensin3 and FAK and Cas has been reported (Cui et al. Mol Cancer Res. 2003). Tensin is also involved in the function of focal adhesions. The LD motif of tensin is located in a disordered region and predicted helical

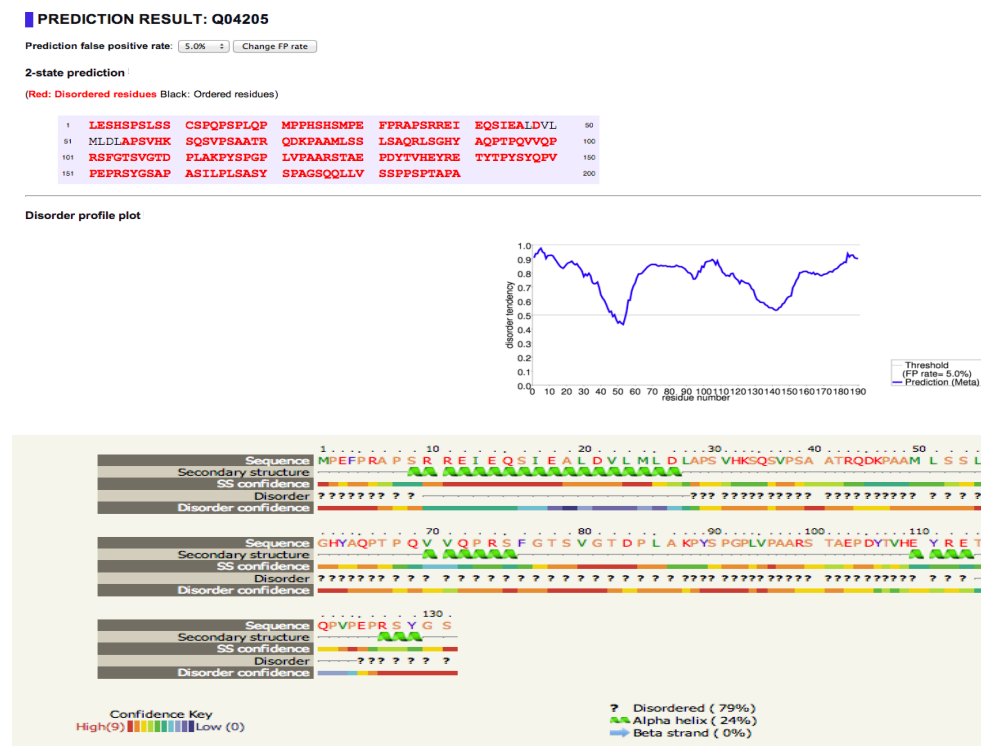

### Supplementary Figure 3:

Isothermal calorimetric titration of FAT with LD4 and previously proposed LD motifs

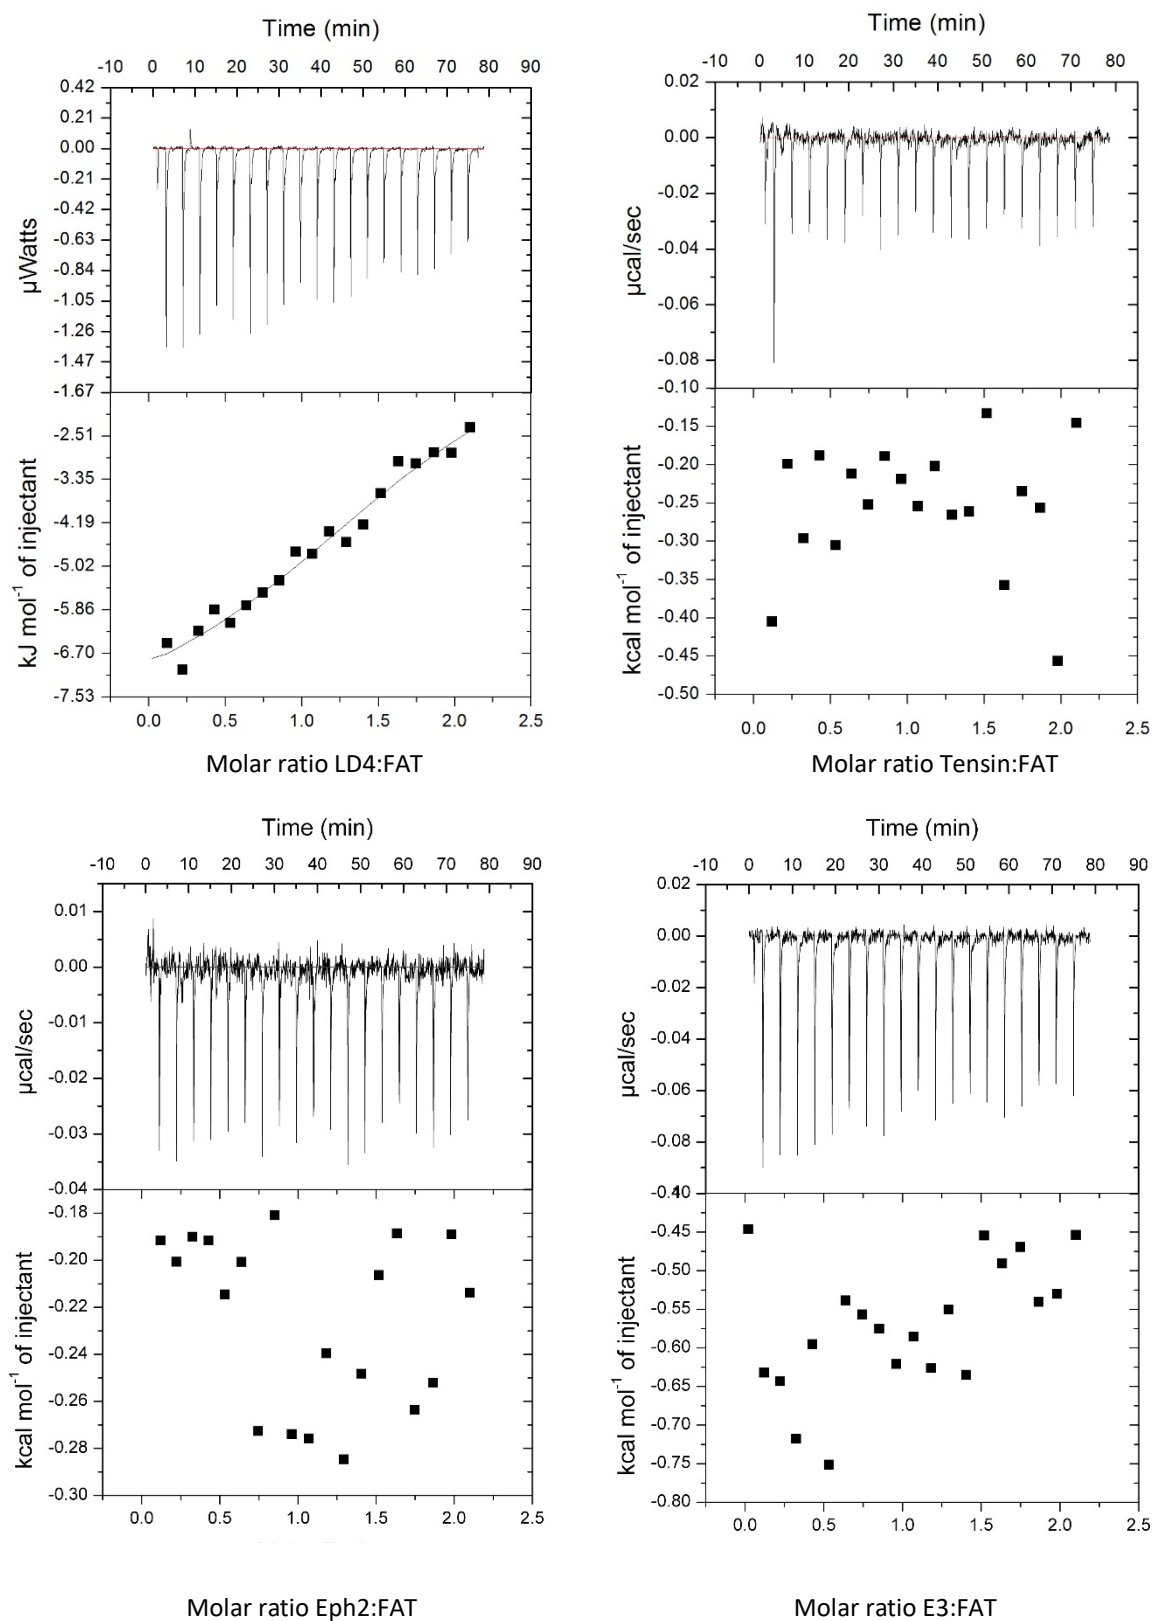

Supplementary Figure 4

Binding assays of known LD motifs and LD motifs proposed by LDMF-proposed to FAT,  $\alpha$ -parvin and GIT1. ACA: anisotropy competition assay; DA: direct fluorescence anisotropy; MST: microscale thermophoresis; DSF: differential scanning fluorimetry.

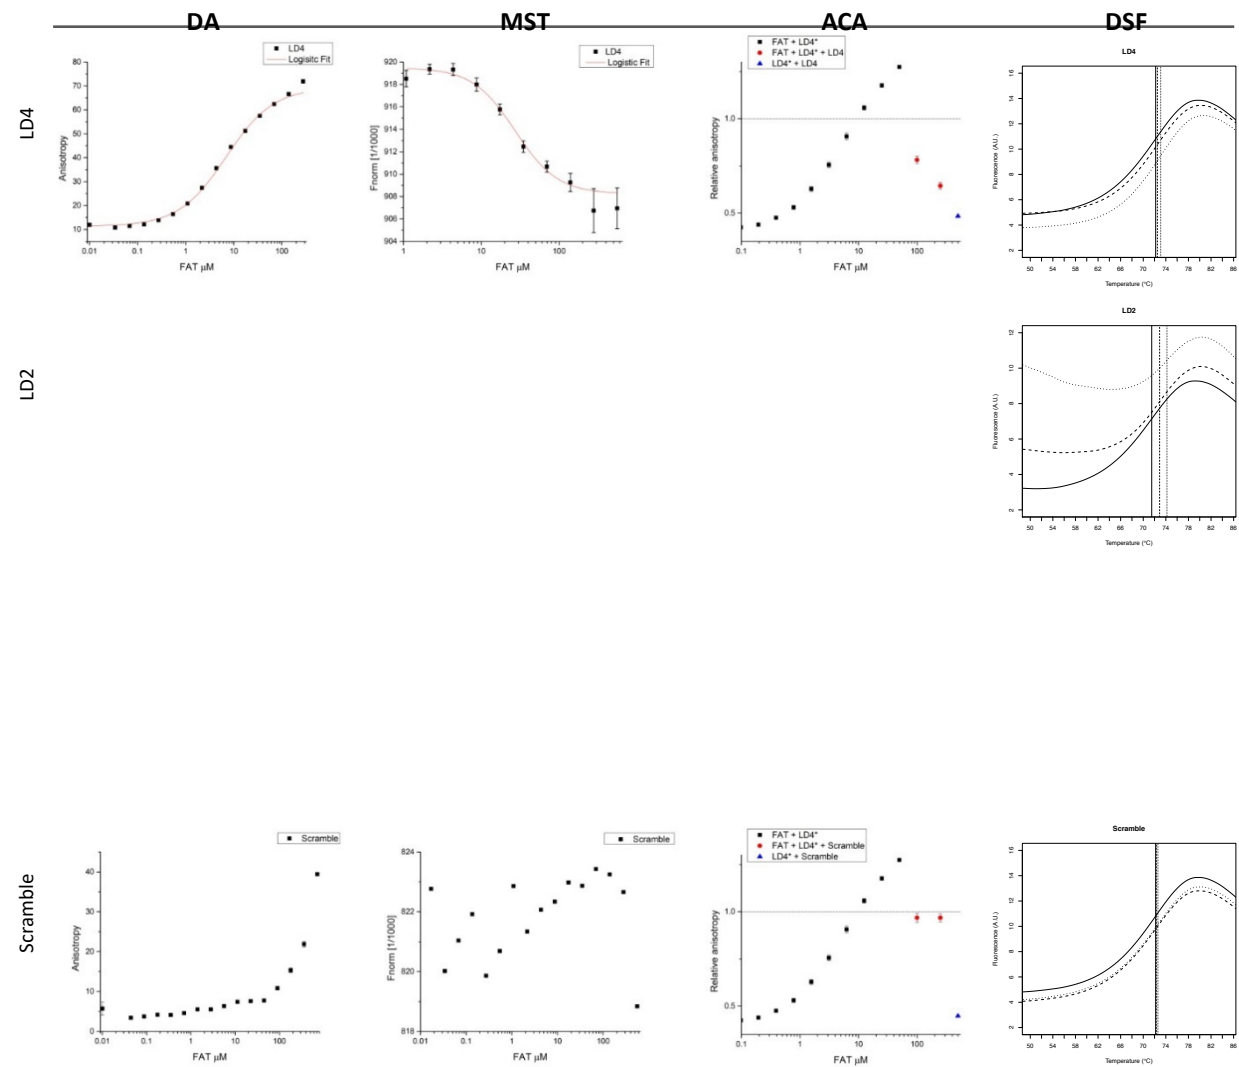

Supplementary Figure 4.1: Binding of LD motif controls to FAT



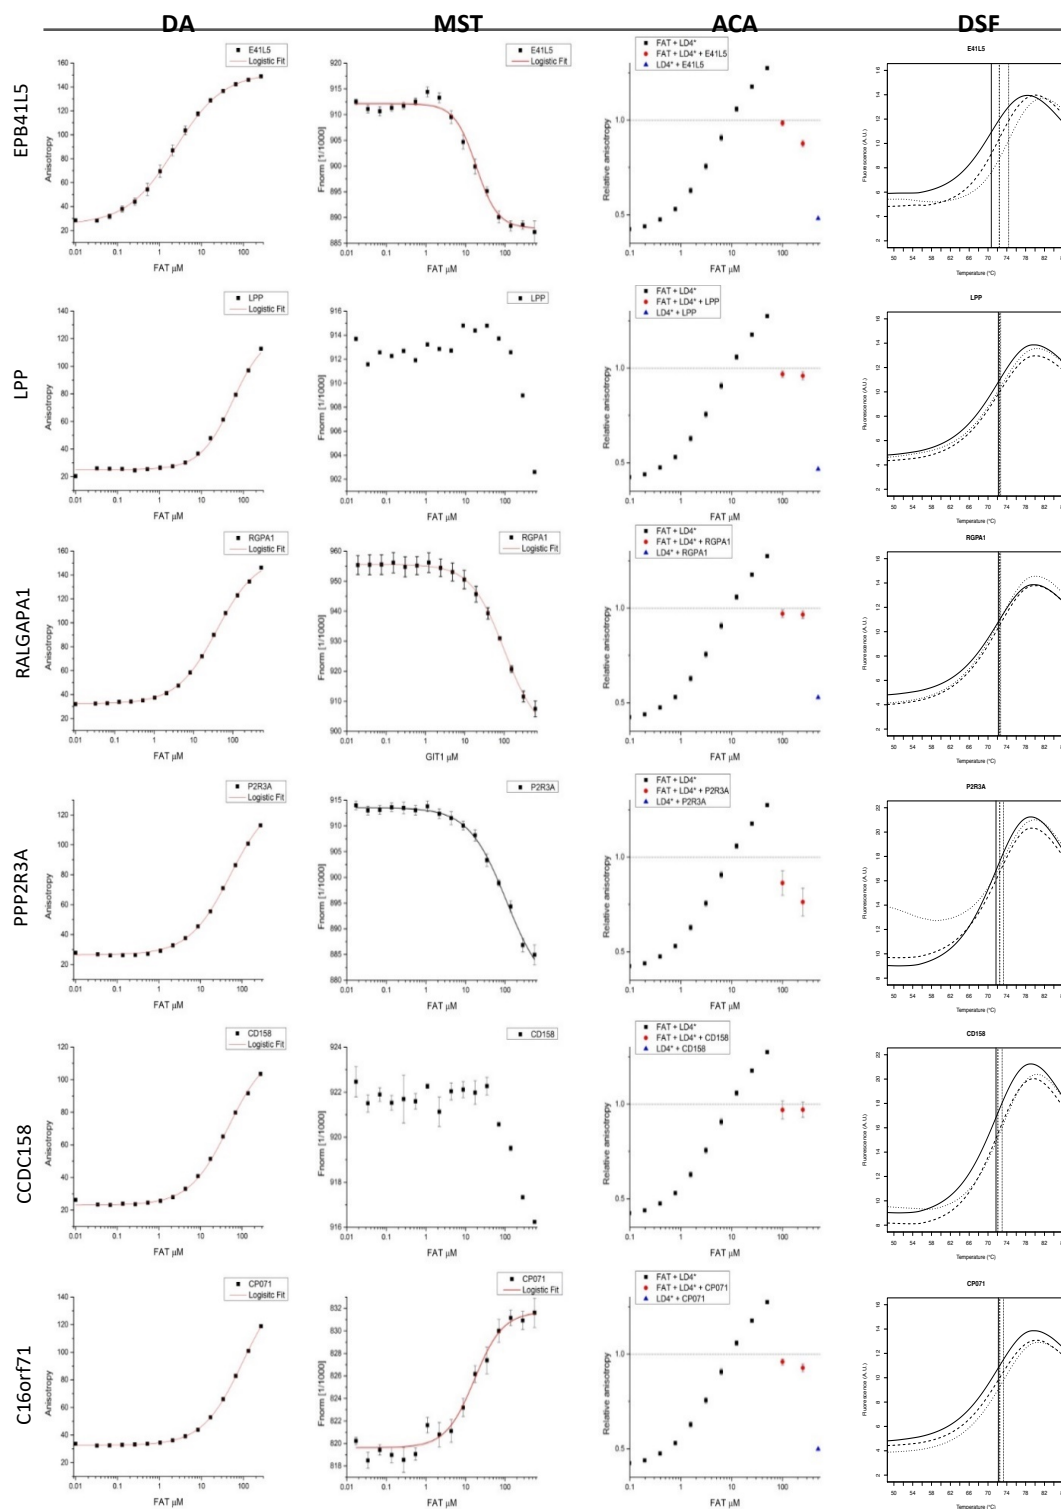

**Supplementary Figure 4.2: Binding of highly likely LD motifs to FAT**

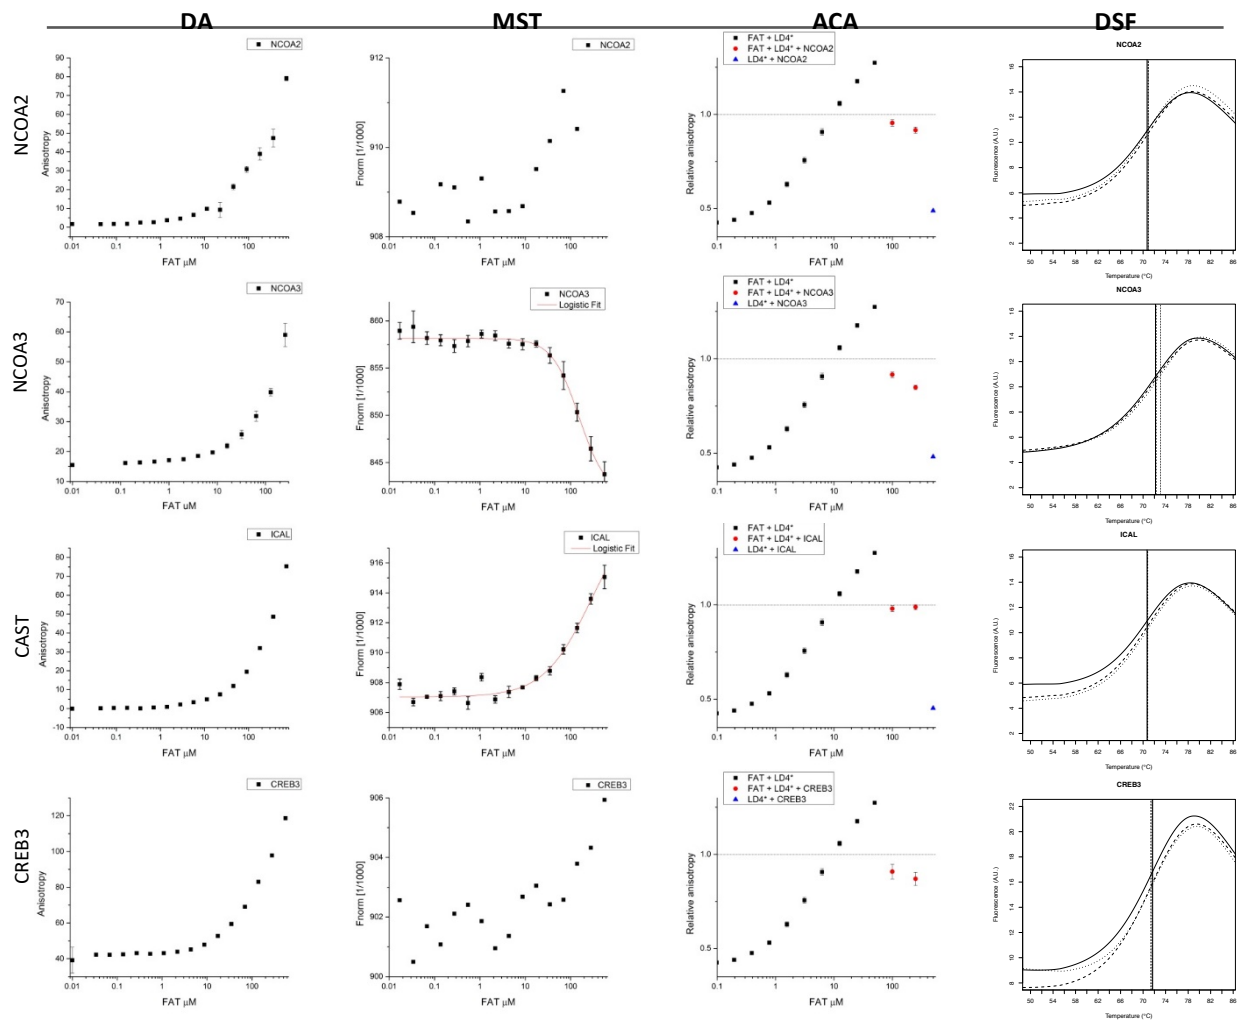

**Supplementary Figure 4.3: Binding of less likely LD motifs to FAT**

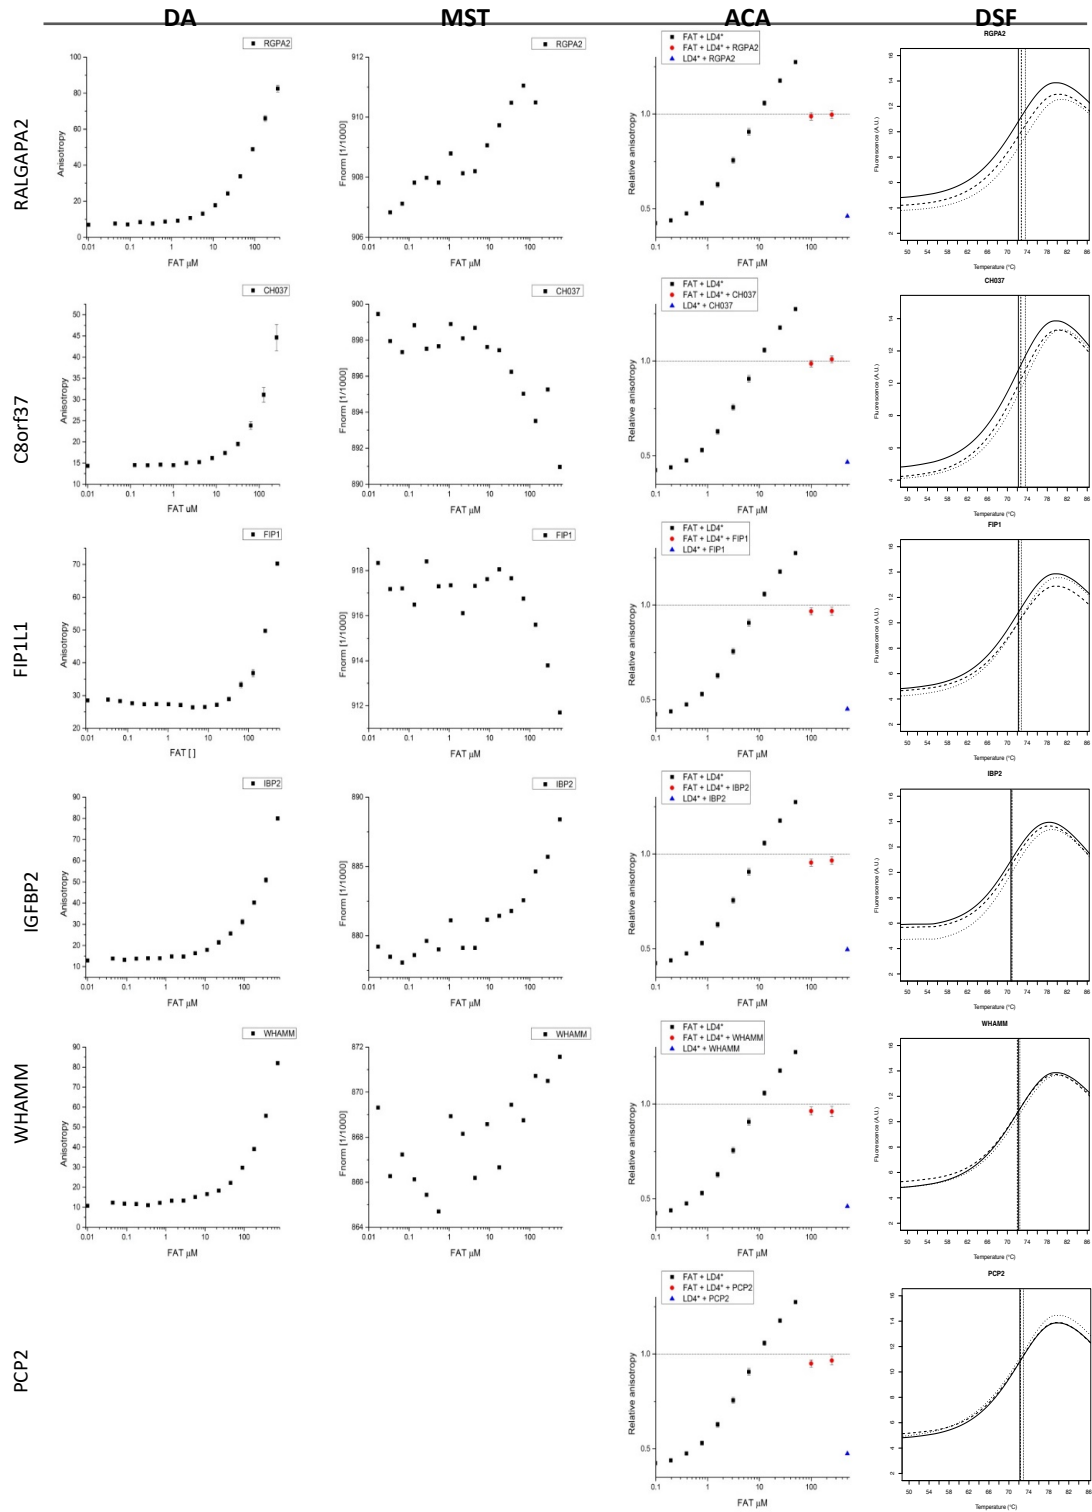

**Supplementary Figure 4.4:** Binding of least likely LD motifs to FAT and motifs discarded in round 1.

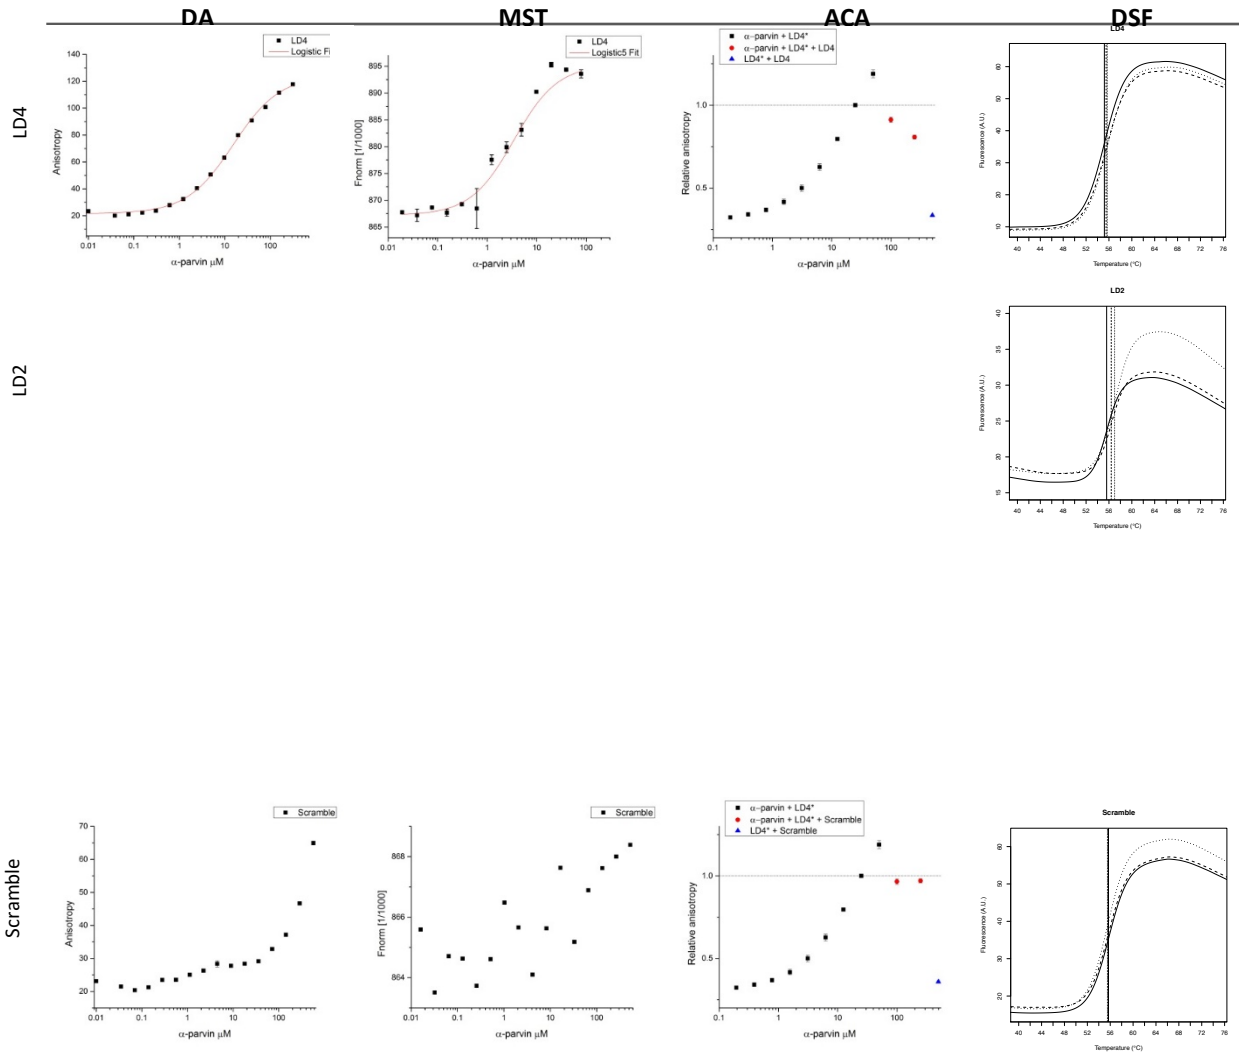

**Supplementary Figure 4.5: Binding of LD motif controls to  $\alpha$ -parvin**

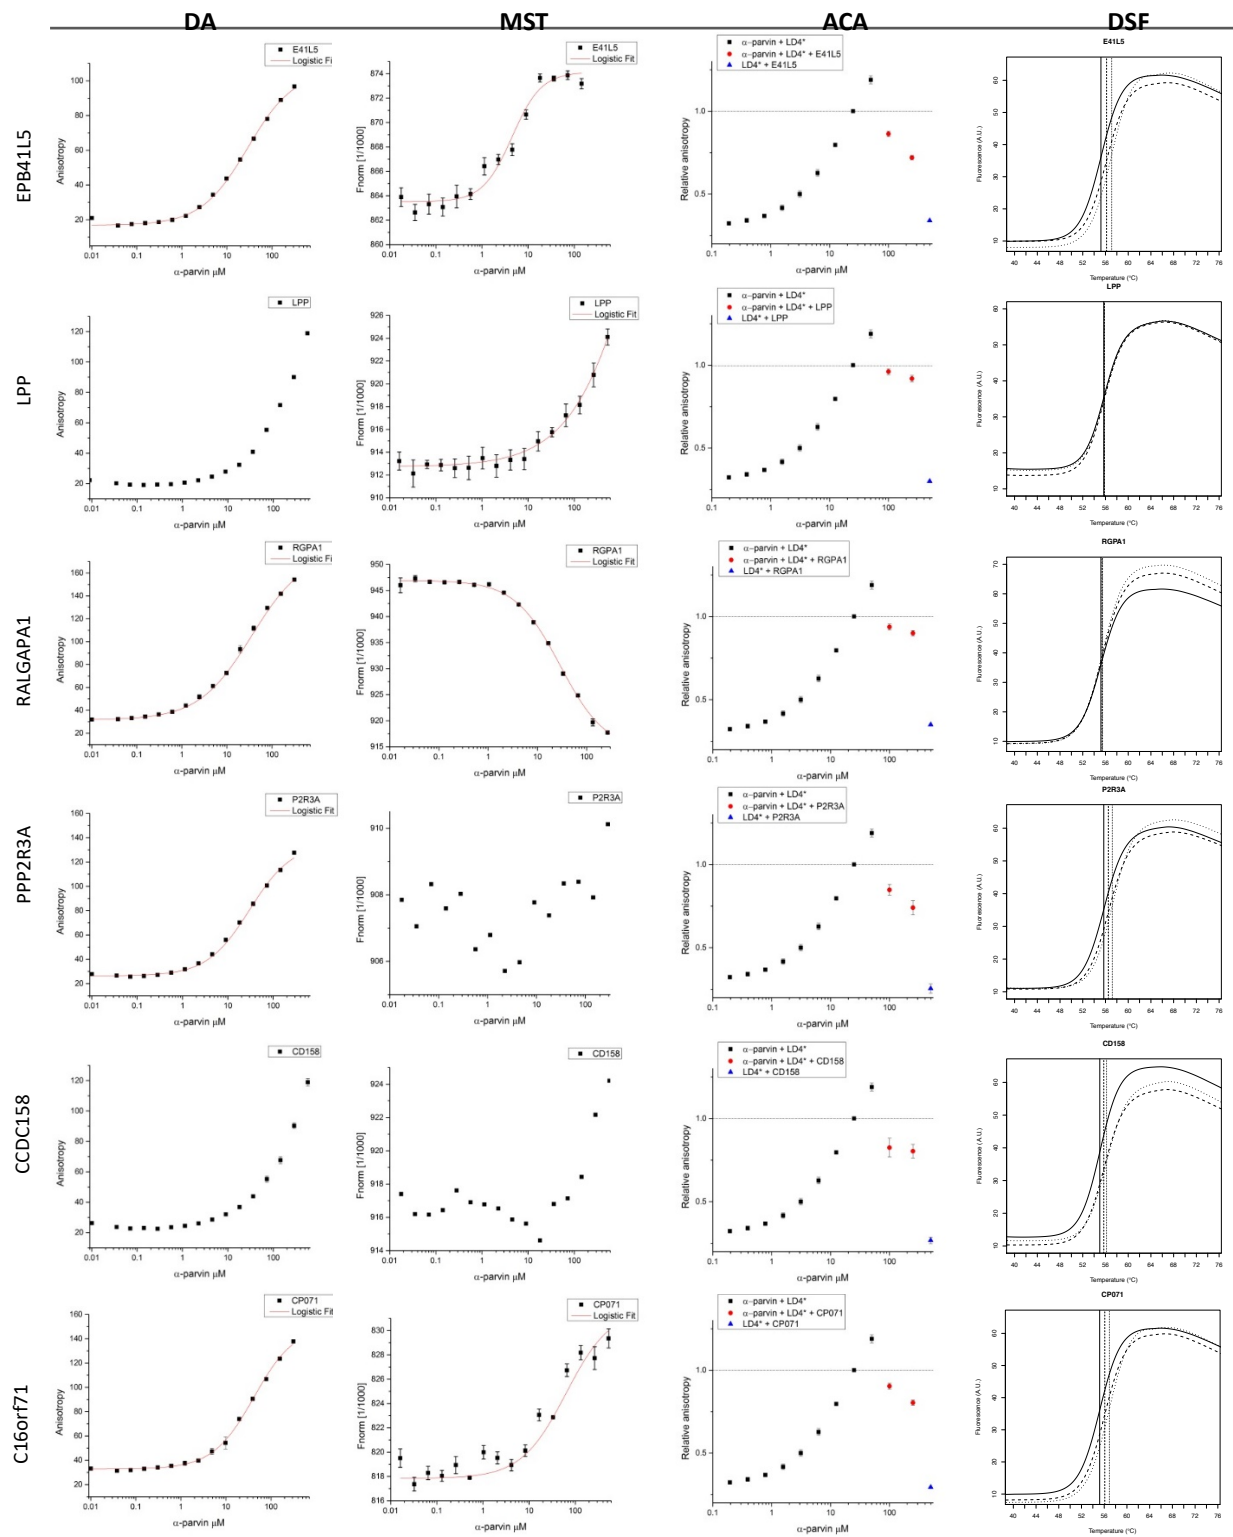

**Supplementary Figure 4.6: Binding of highly likely LD motifs to  $\alpha$ -parvin**

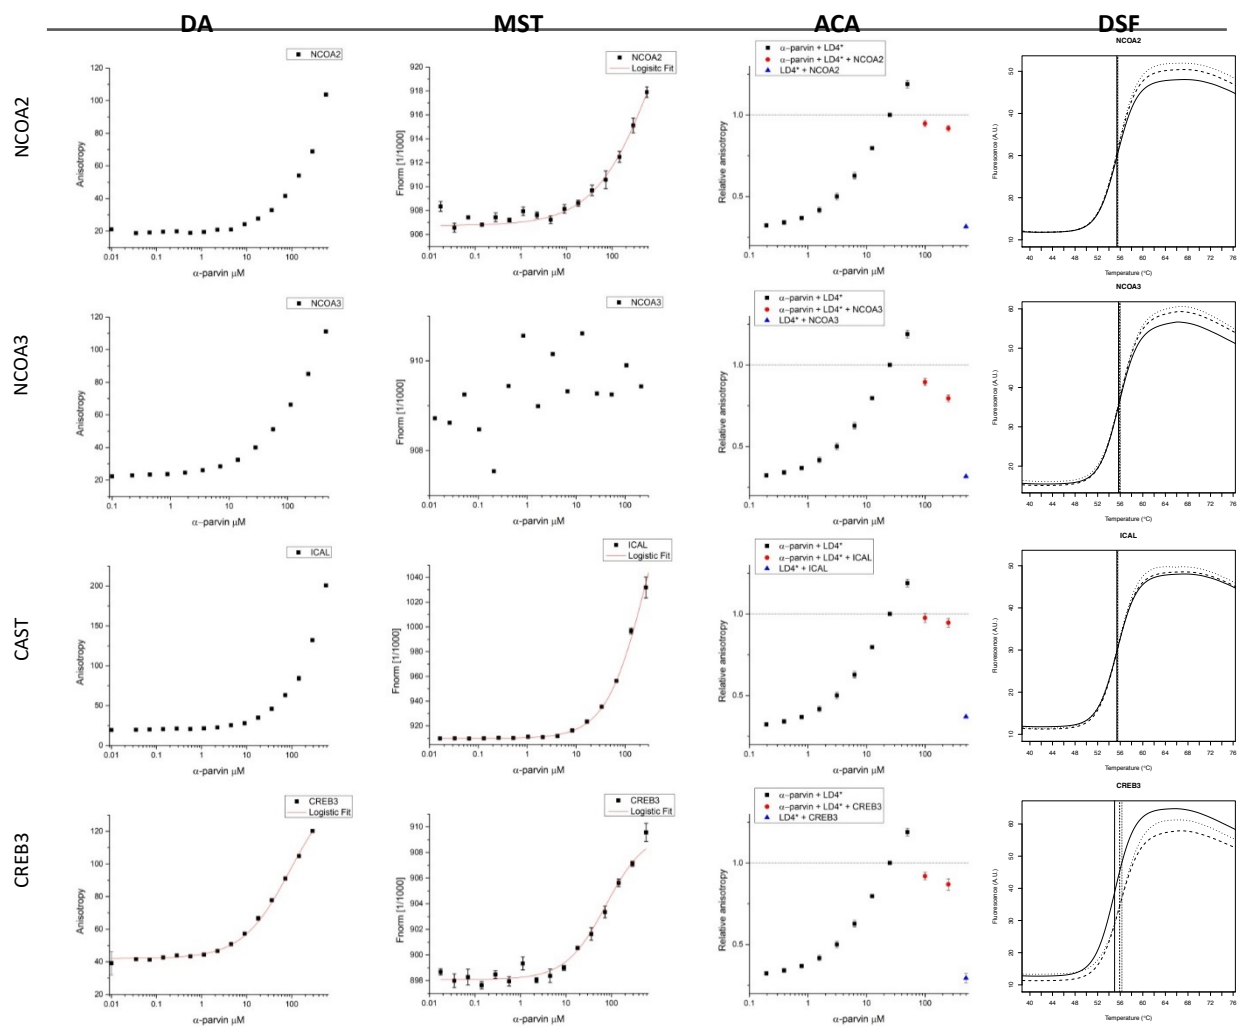

**Supplementary Figure 4.7: Binding of less likely LD motifs to  $\alpha$ -parvin**

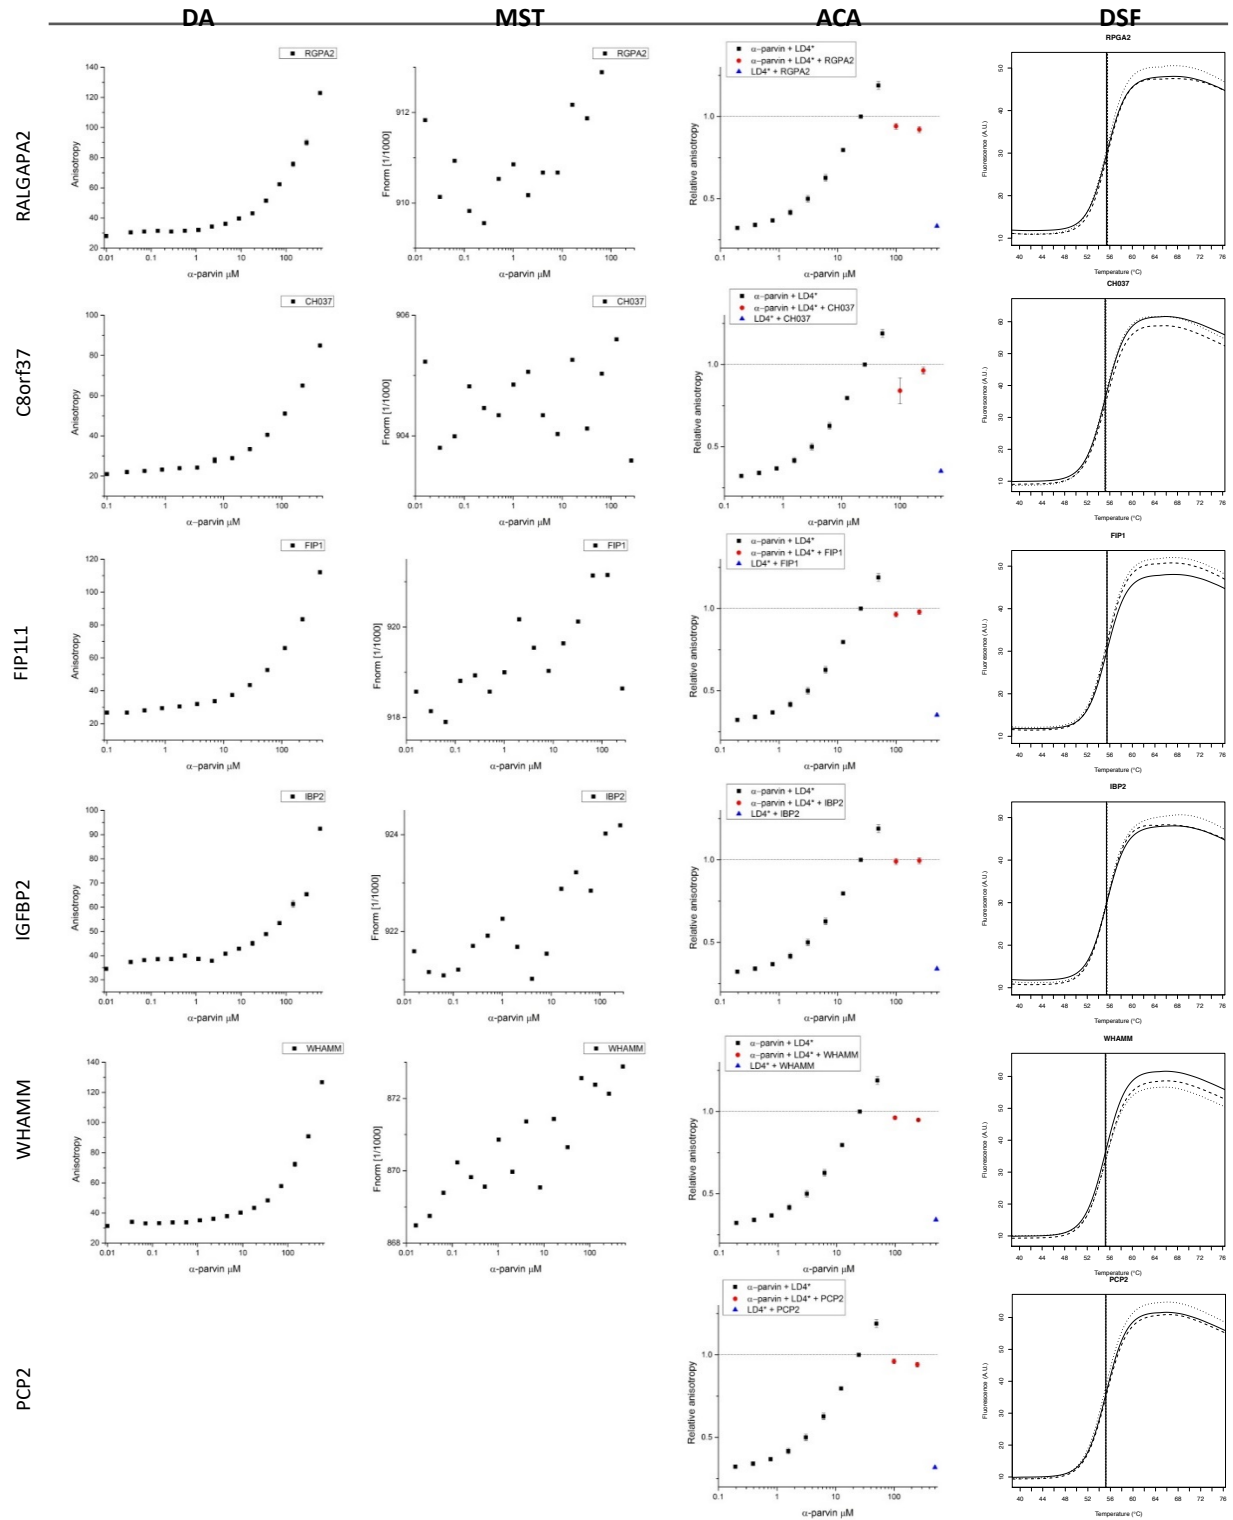

**Supplementary Figure 4.8:** Binding of least likely LD motifs to  $\alpha$ -parvin and motifs discarded in round 1

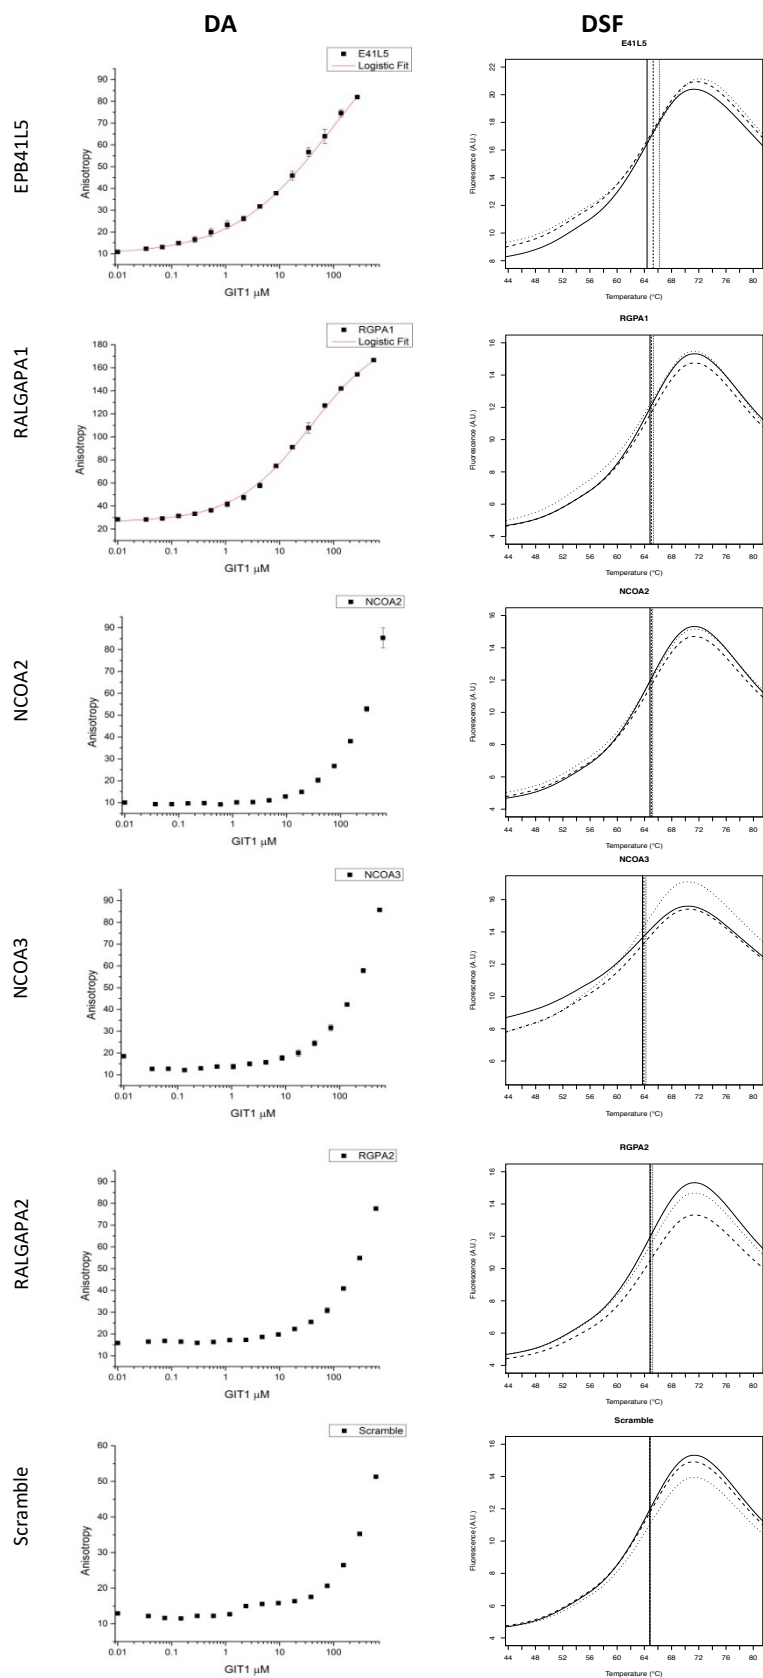

**Supplementary Figure 4.9: Binding of LD motif candidates to GIT1.**



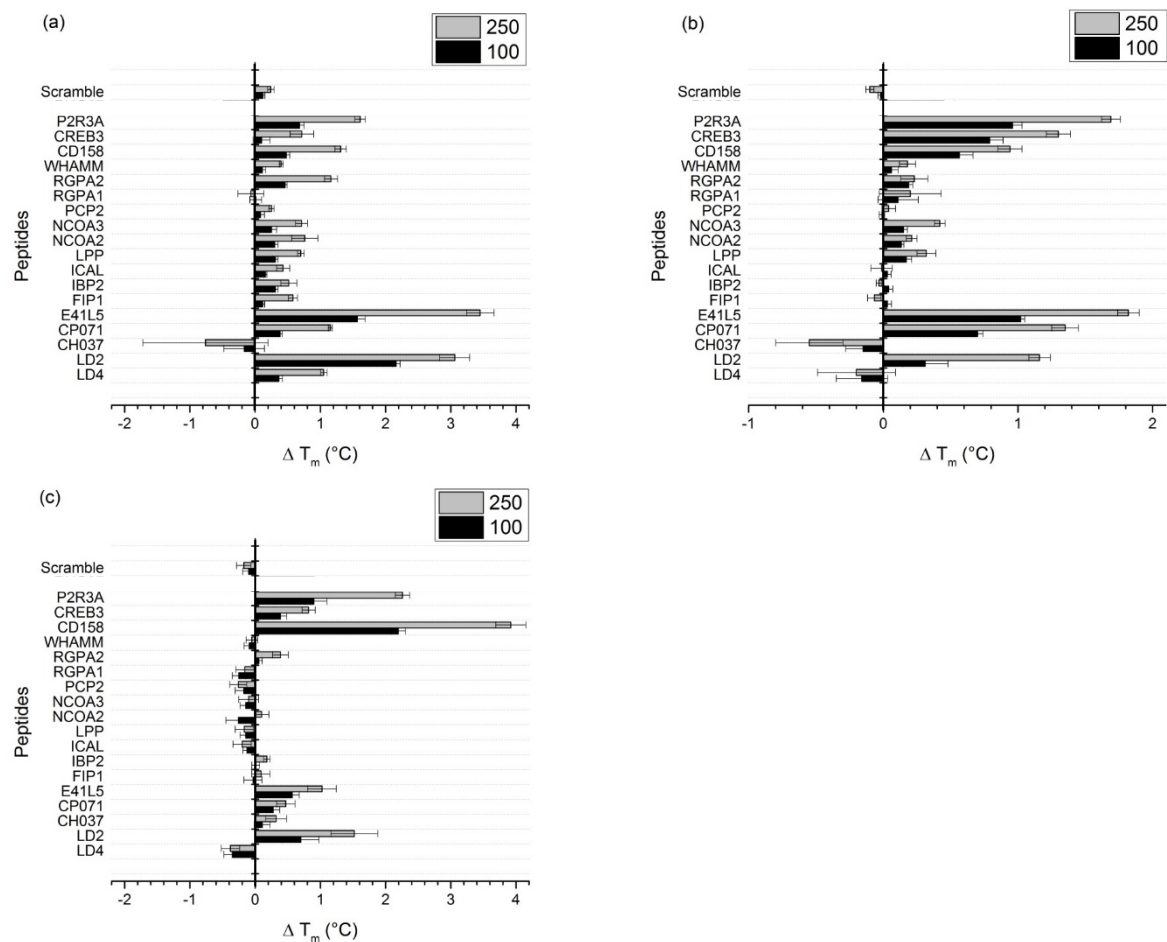

**Supplementary Figure 4.10:** T<sub>m</sub> shift in °C for differential scanning fluorimetry for peptides with (a) FAT (b)  $\alpha$ -parvin and (c) GIT1. The Uniprot identifiers are given instead of protein gene names. Genes were both identifiers differ are P2R3A: PPP2R3A; CD158:CCDC158; RGPA1/2: RALGAPA1/2; ICAL: CAST; IBP2: IGFBP2; FIP1: FIP1L1; E41L5: EPB41L5; CP071: C16orf71; CP037: C8orf37.

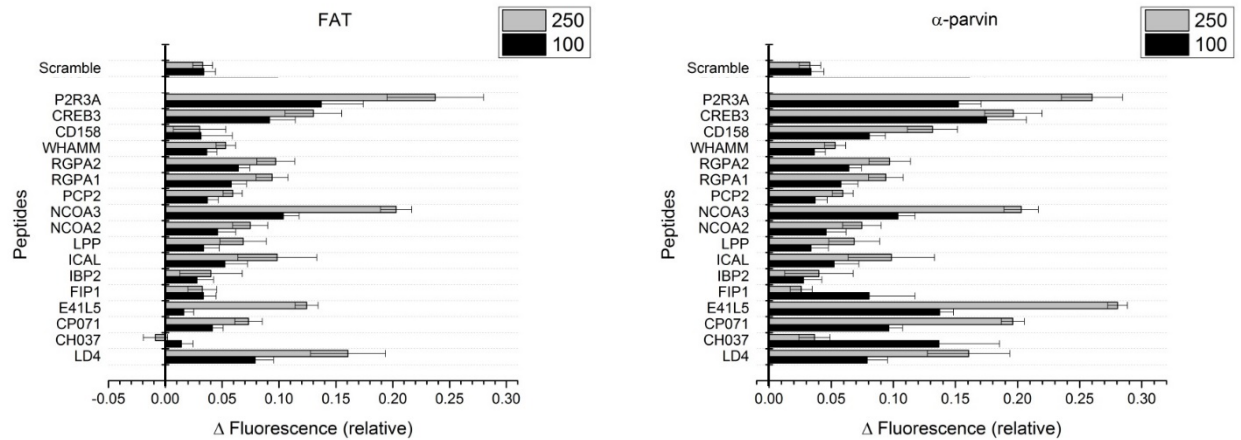

**Supplementary Figure 4.11: Anisotropy competition assay plotted as difference in fluorescence anisotropy.** Proteins were kept at a concentration corresponding to the  $K_d$  of their interaction with labeled LD4 (10  $\mu$ M for FAT and 25  $\mu$ M for  $\alpha$ -parvin), in the presence of 0.1  $\mu$ M labeled LD4. To that, each non-labeled LD motif candidate peptide was added at 100 or 250  $\mu$ M. Plotted are the resulting relative changes of the fluorescence anisotropy in presence of the unlabeled candidate peptides. The Uniprot identifiers are given instead of protein gene names. Genes were both identifiers differ are P2R3A: PPP2R3A; CD158:CCDC158; RGA1/2: RALGAP1/2; ICAL: CAST; IBP2: IGFBP2; FIP1: FIP1L1; E41L5: EPB41L5; CP071: C16orf71; CP037: C8orf37.

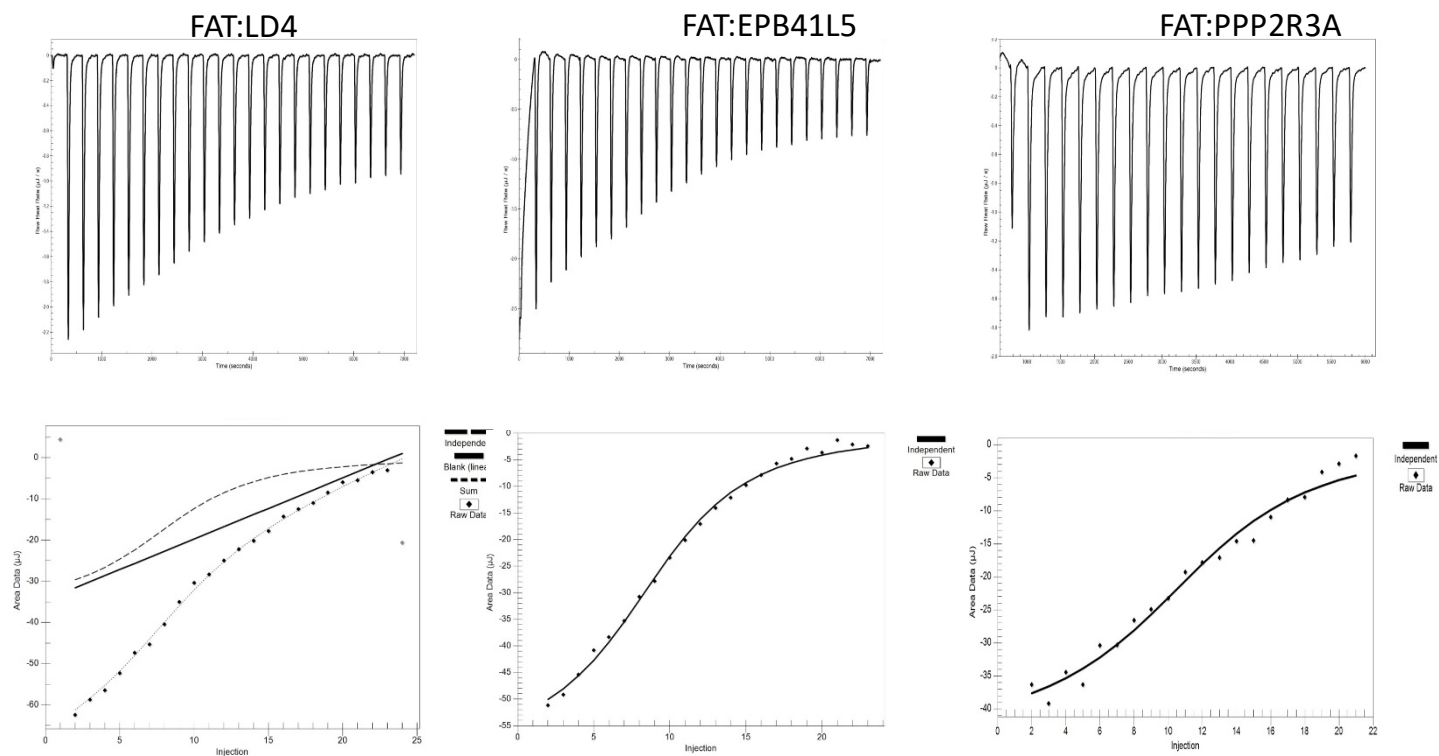

**Supplementary Figure 4.12: Titration of FAT on to LD motifs**

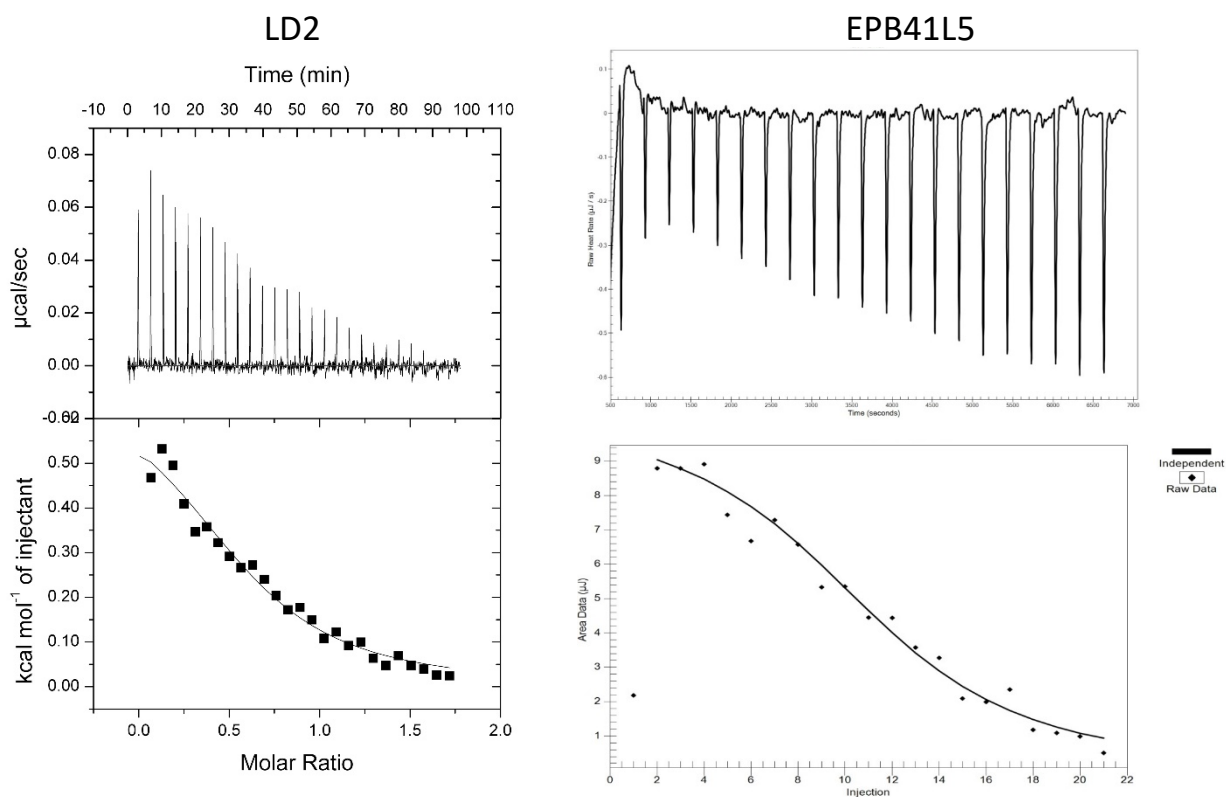

**Supplementary Figure 4.13: Titration of GIT1 on to LD2 and EPB41L5**

## Supplementary Figure 5:

$^1\text{H}$ - $^{15}\text{N}$  HSQC titration experiments. Shown are the NMR chemical shifts of  $^{15}\text{N}$ -labelled FAT domain titrated with LD4, LD2, DLC1, LPP, and CD158.

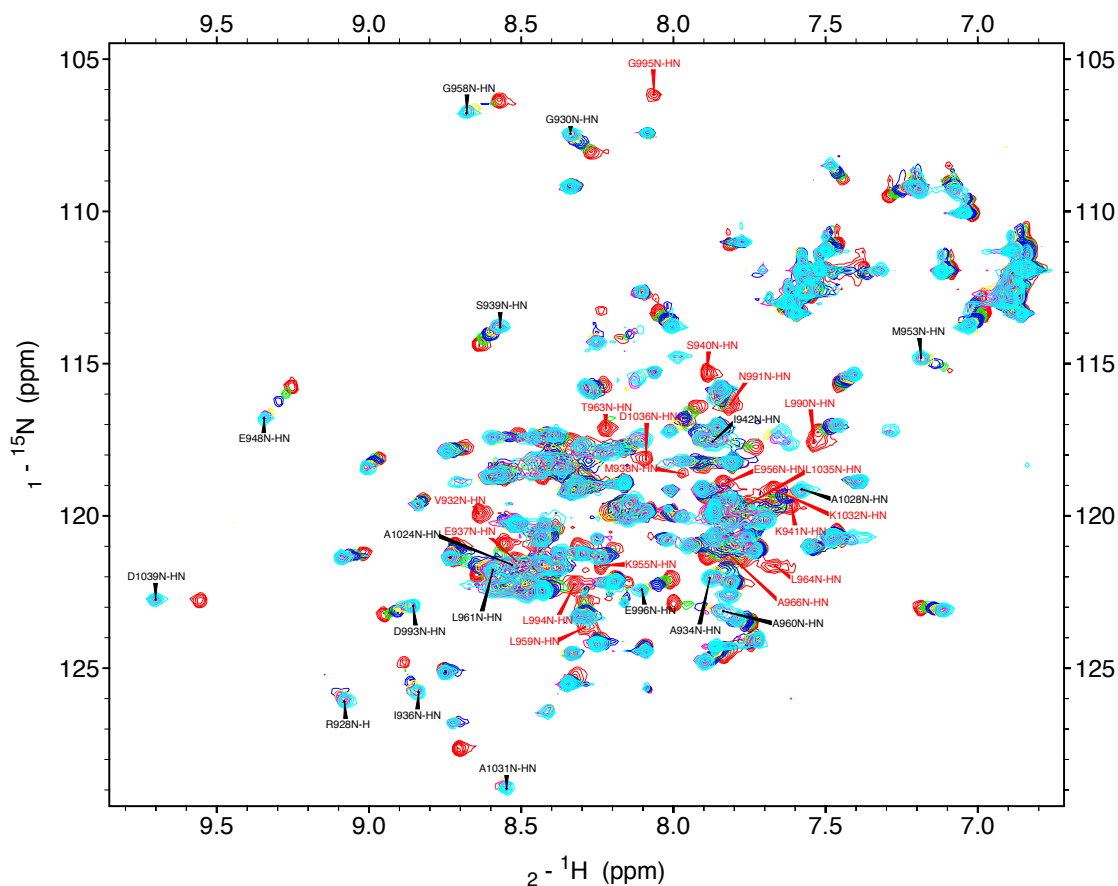

**Supplementary Figure 5.1: FAT/LD2 Titration.** Overlay of  $^1\text{H}$ - $^{15}\text{N}$ -HSQC spectra of 100  $\mu\text{M}$   $^{15}\text{N}$ -FAT in the absence (red) and presence of 0.5 (green), 1 (blue), 2 (yellow), 3 (magenta) and 4 (cyan) times molar excess of LD2 peptide. Resonances that disappeared upon LD2 addition are labelled in red. Resonances that significantly shifted  $>2\sigma = 0.13$  are labelled in black. All spectra were recorded at 25°C at a proton frequency of 950 MHz.

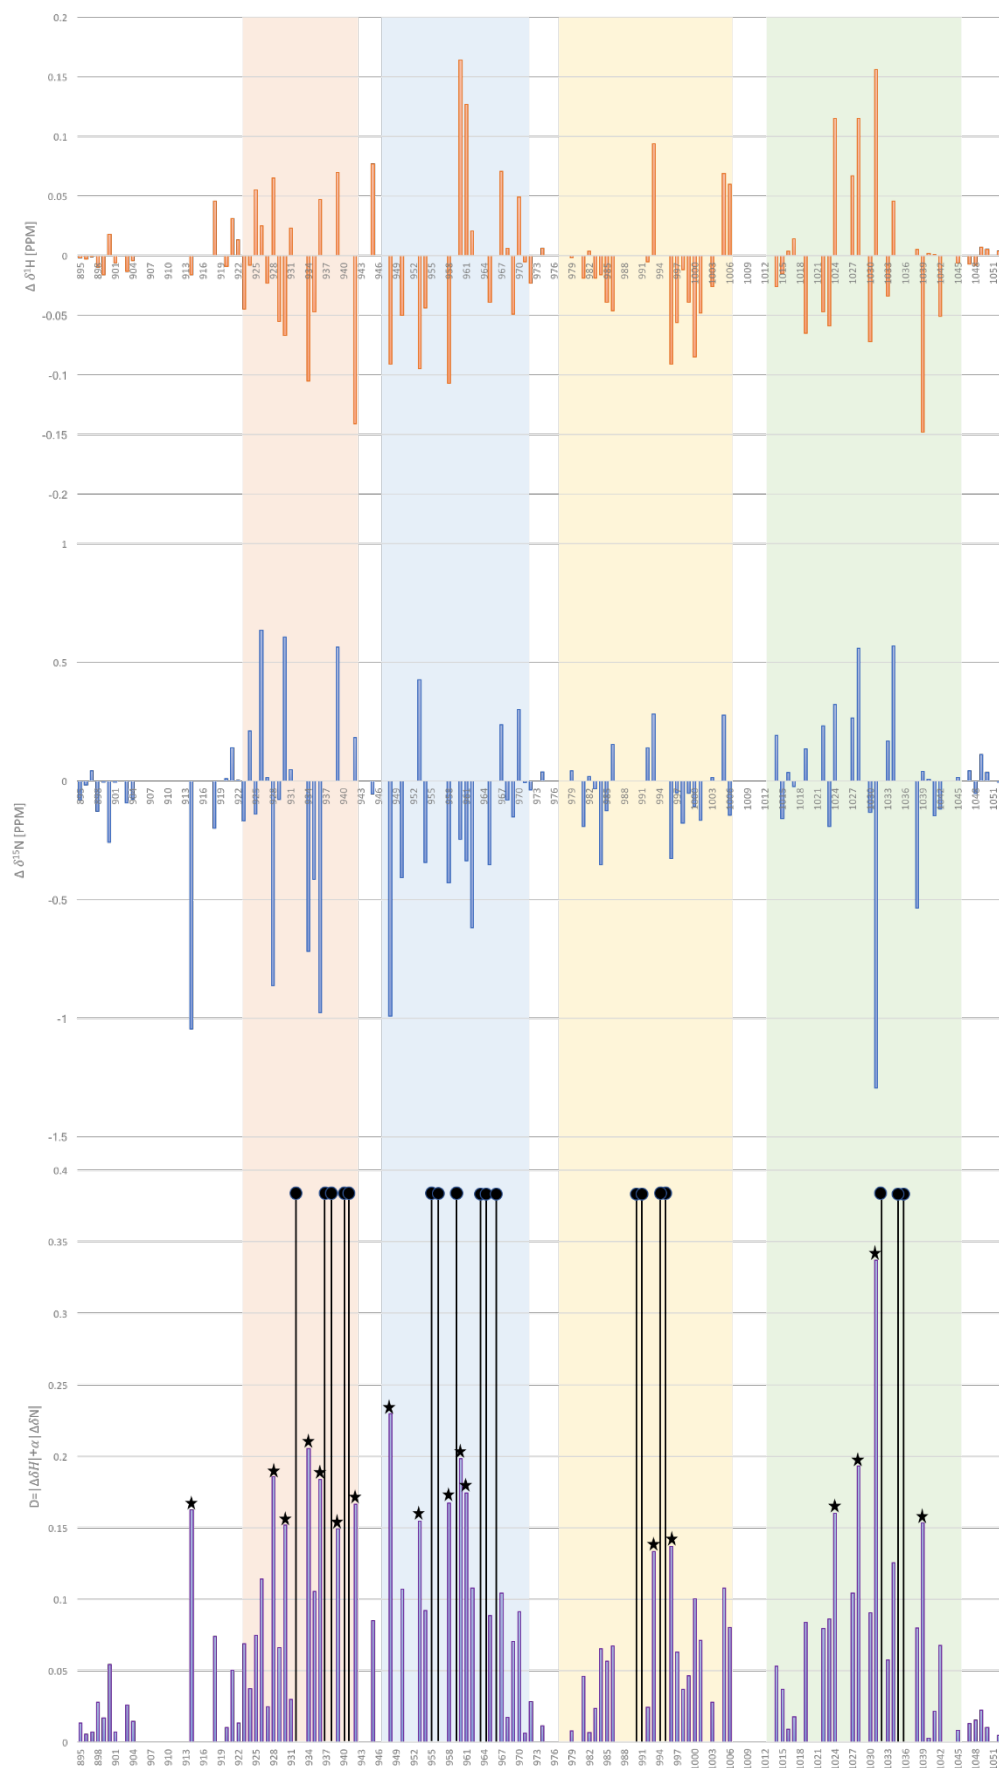

**Supplementary Figure 5.2: Chemical shift changes in FAT induced by the LD2 peptide.** Chemical shift differences in ppm were calculated for  $^1\text{H}$  (top panel),  $^{15}\text{N}$  (middle panel) and the weighted combined  $^1\text{H},^{15}\text{N}$  (lower panel) chemical shift perturbation of FAT in the presence of a four times molar excess of LD2 peptide. Resonances showing significant change (greater than  $2\sigma = 0.13$ ) are marked by stars. Others that disappeared upon LD2 addition are marked by full black circles. The shaded areas represent the helices (orange for helix1, blue for helix2, yellow for helix3, green for helix4).

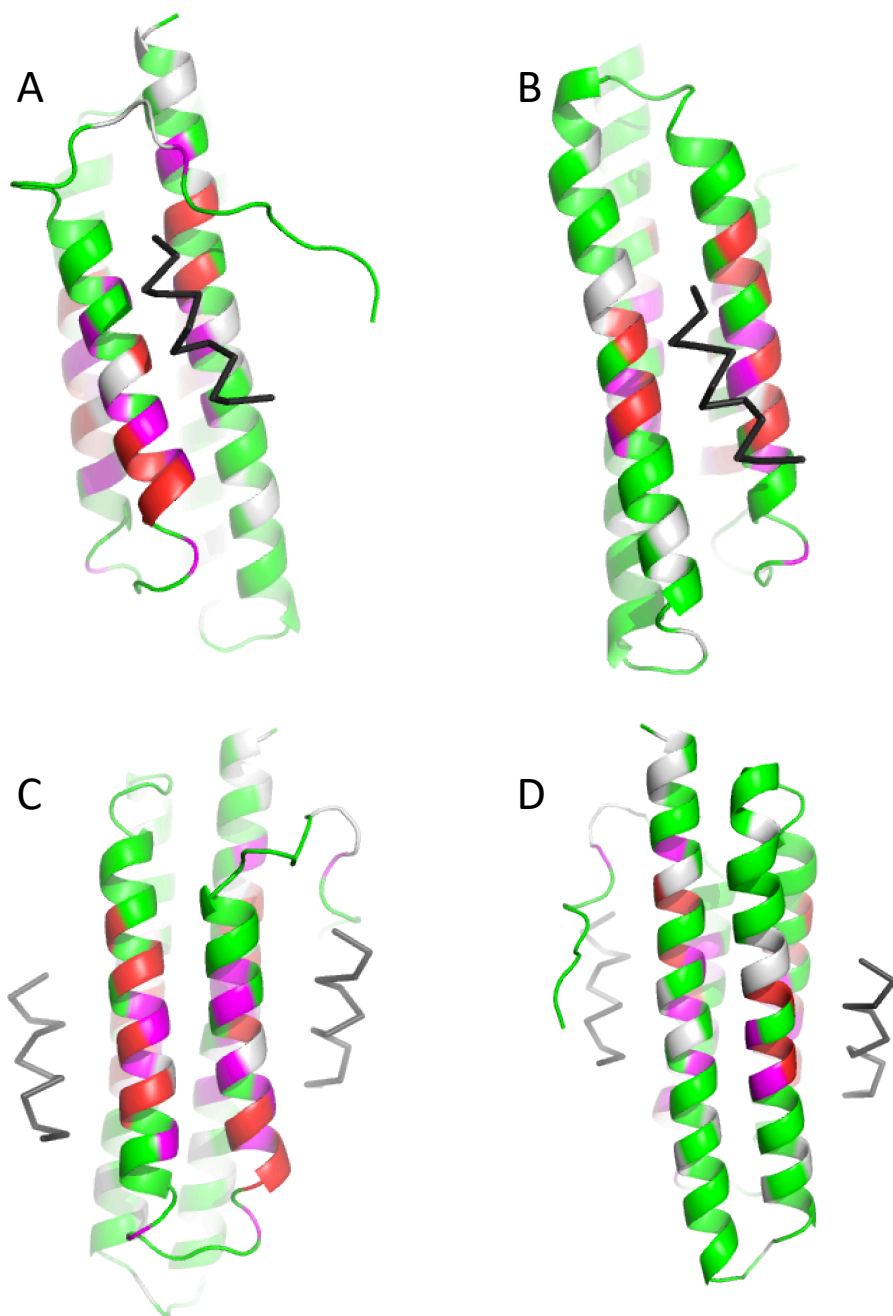

**Supplementary Figure 5.3: Mapping changes of NMR resonances on FAT structure upon titration with LD2** where A is the face of FAT helices 1 and 4, B is 2-3 helices, C is 1-2 helices and D is 3-4 helices. Resonances showing significant changes are labeled in magenta. LD2 is represented as a ribbon. Others that disappeared are labeled in red. Gray residues represent amino acids whose peaks are not assigned. This figure was prepared using the PDB file 1OW8 (Paxillin LD2 motif bound to FAT of FAK)



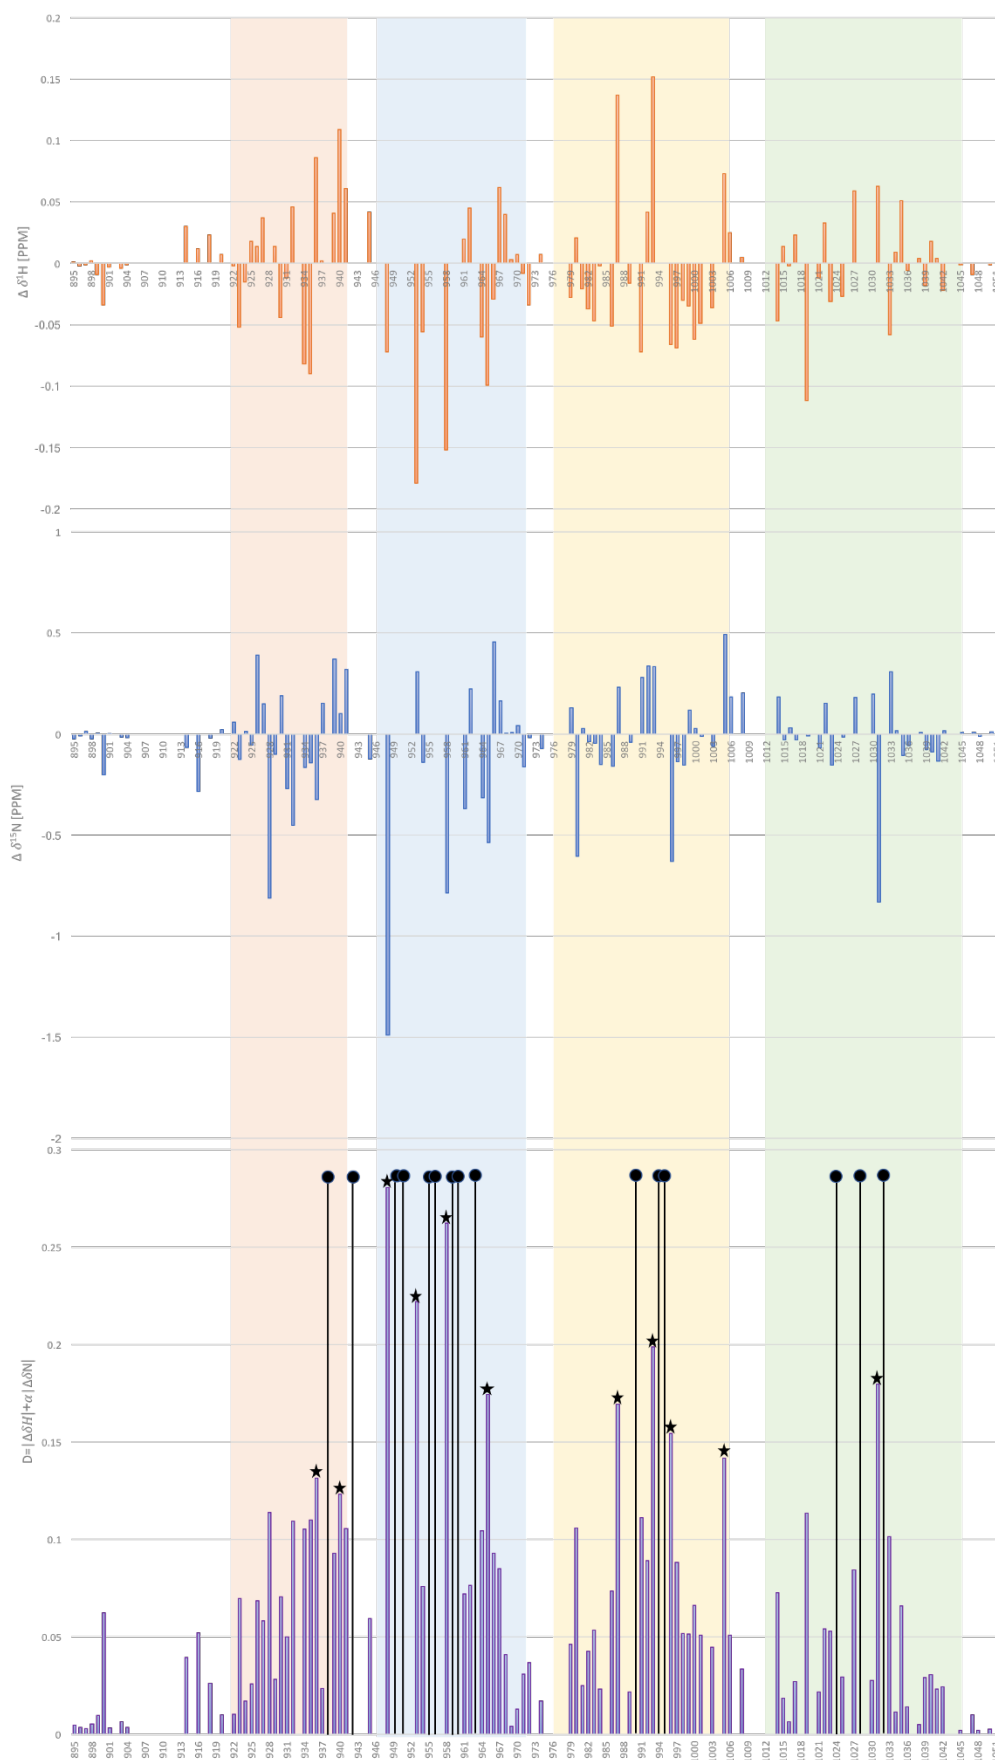

**Supplementary Figure 5.5: Chemical shift changes in FAT induced by LD4 peptide.** Chemical shift differences in ppm where calculated for  $^1\text{H}$  (top panel),  $^{15}\text{N}$  (middle panel) and the weighted combined  $^1\text{H},^{15}\text{N}$  (lower panel) chemical shift perturbation of FAT in the presence of a four times molar excess of LD4 peptide. Resonances showing significant change (greater than  $2\sigma=0.12$ ) are marked by stars. Others that disappeared upon LD2 addition are marked by full black circles. The shaded areas represent the helices (orange for helix1, blue for helix2, yellow for helix3, green for helix4).



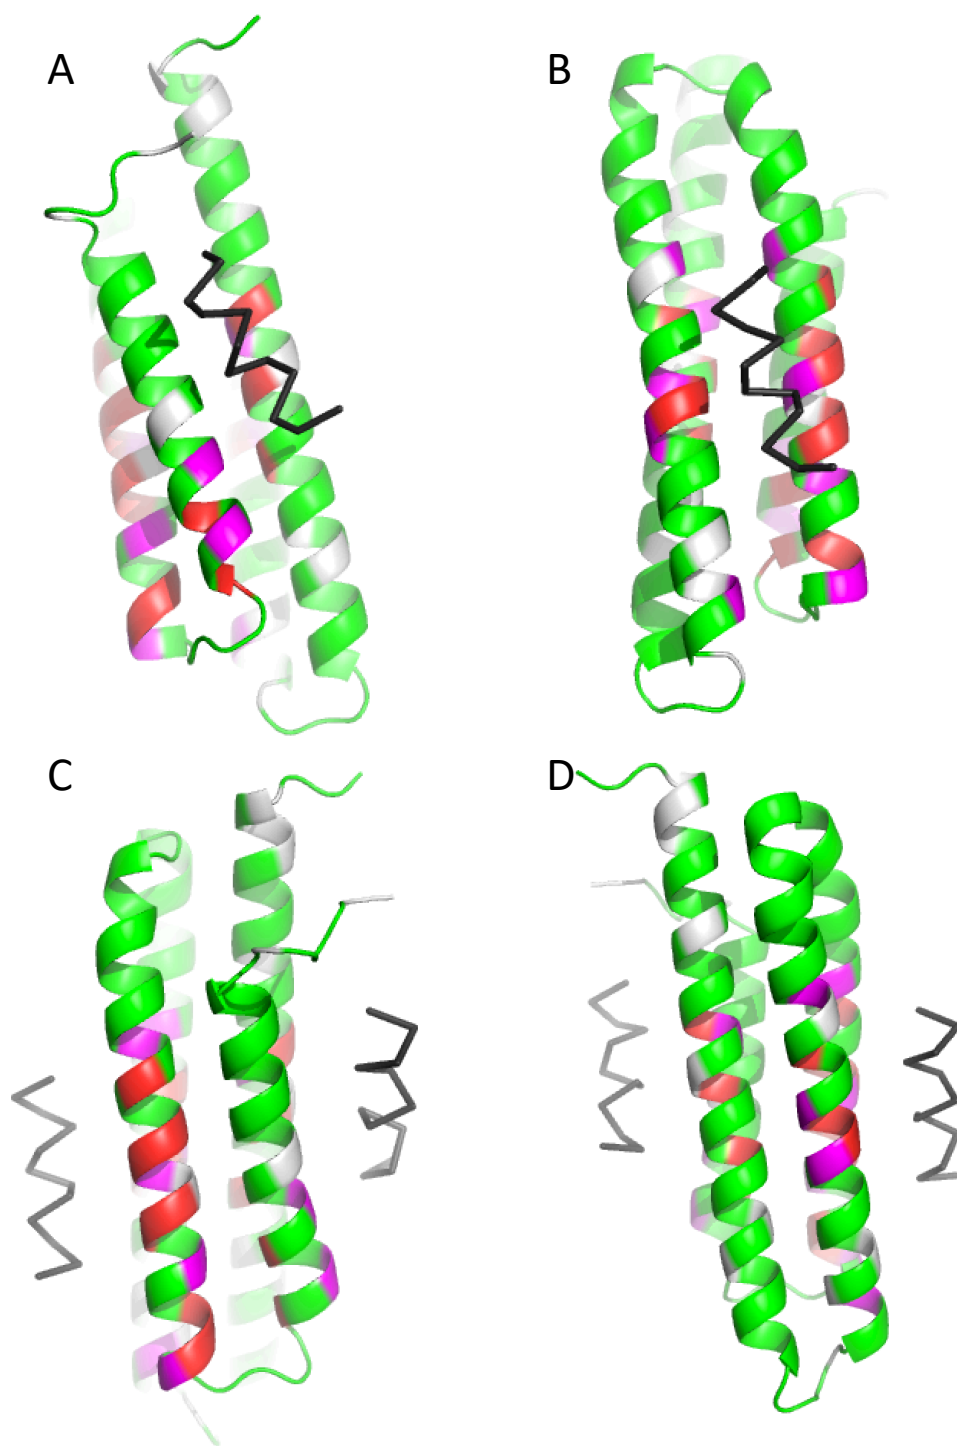

**Supplementary Figure 5.6: Mapping changes of NMR resonances on FAT structure upon titration with LD4** where A is the face of FAT helices 1 and 4, B is 2-3 helices, C is 1-2 helices and D is 3-4 helices. Resonances showing significant changes are labeled in magenta. LD4 is represented as a ribbon. Others that disappeared are labeled in red. Gray residues represent amino acids whose peaks are not assigned. This figure was prepared using the PDB file 1OW7 (Paxillin LD4 motif bound to FAT of FAK).

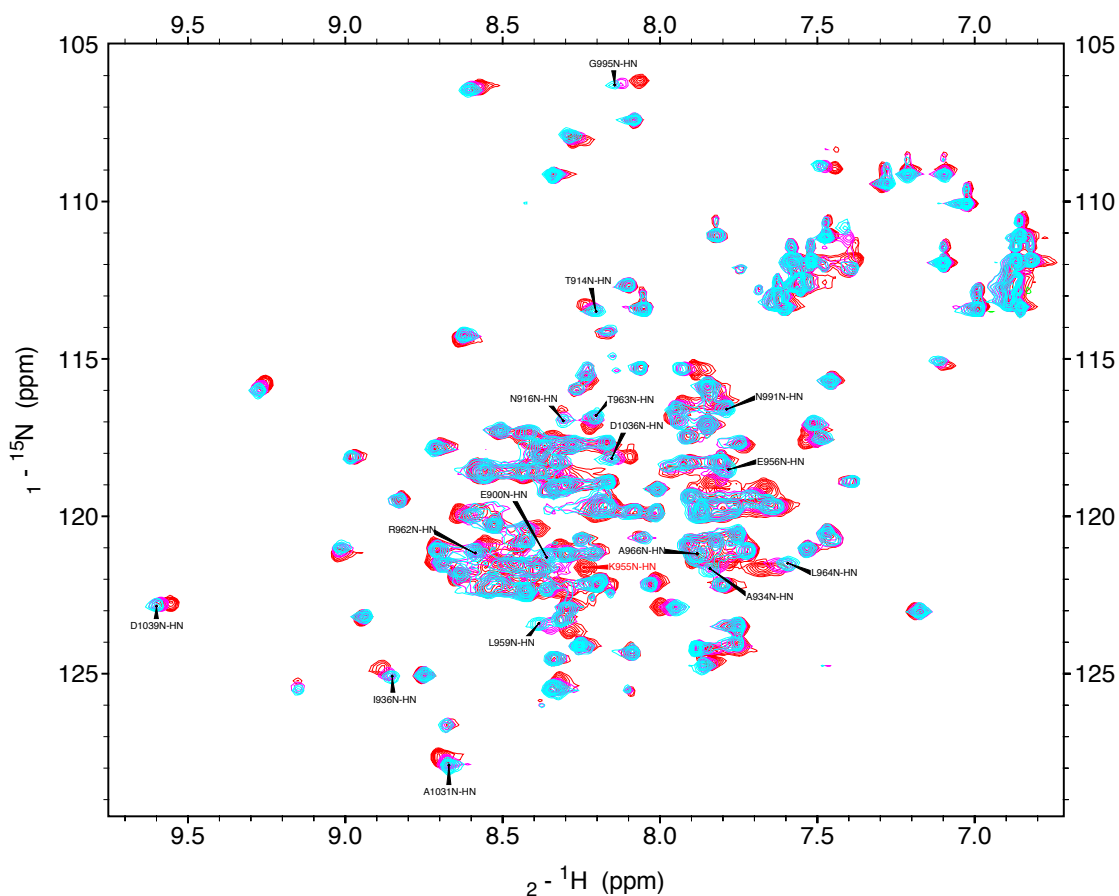

**Supplementary Figure 5.7: FAT/LPP titration.** Overlay of  $^1\text{H}$ - $^{15}\text{N}$ -HSQC spectra of 100  $\mu\text{M}$   $^{15}\text{N}$ -FAT in the absence (red) and presence of 3 (magenta) and 5 (cyan) times molar excess of LPP peptide. Resonances that disappeared upon LPP addition are labelled in red. Resonances that significantly shifted  $>2\sigma = 0.055$  are labelled in black. All spectra were recorded at 25°C at a proton frequency of 950 MHz.

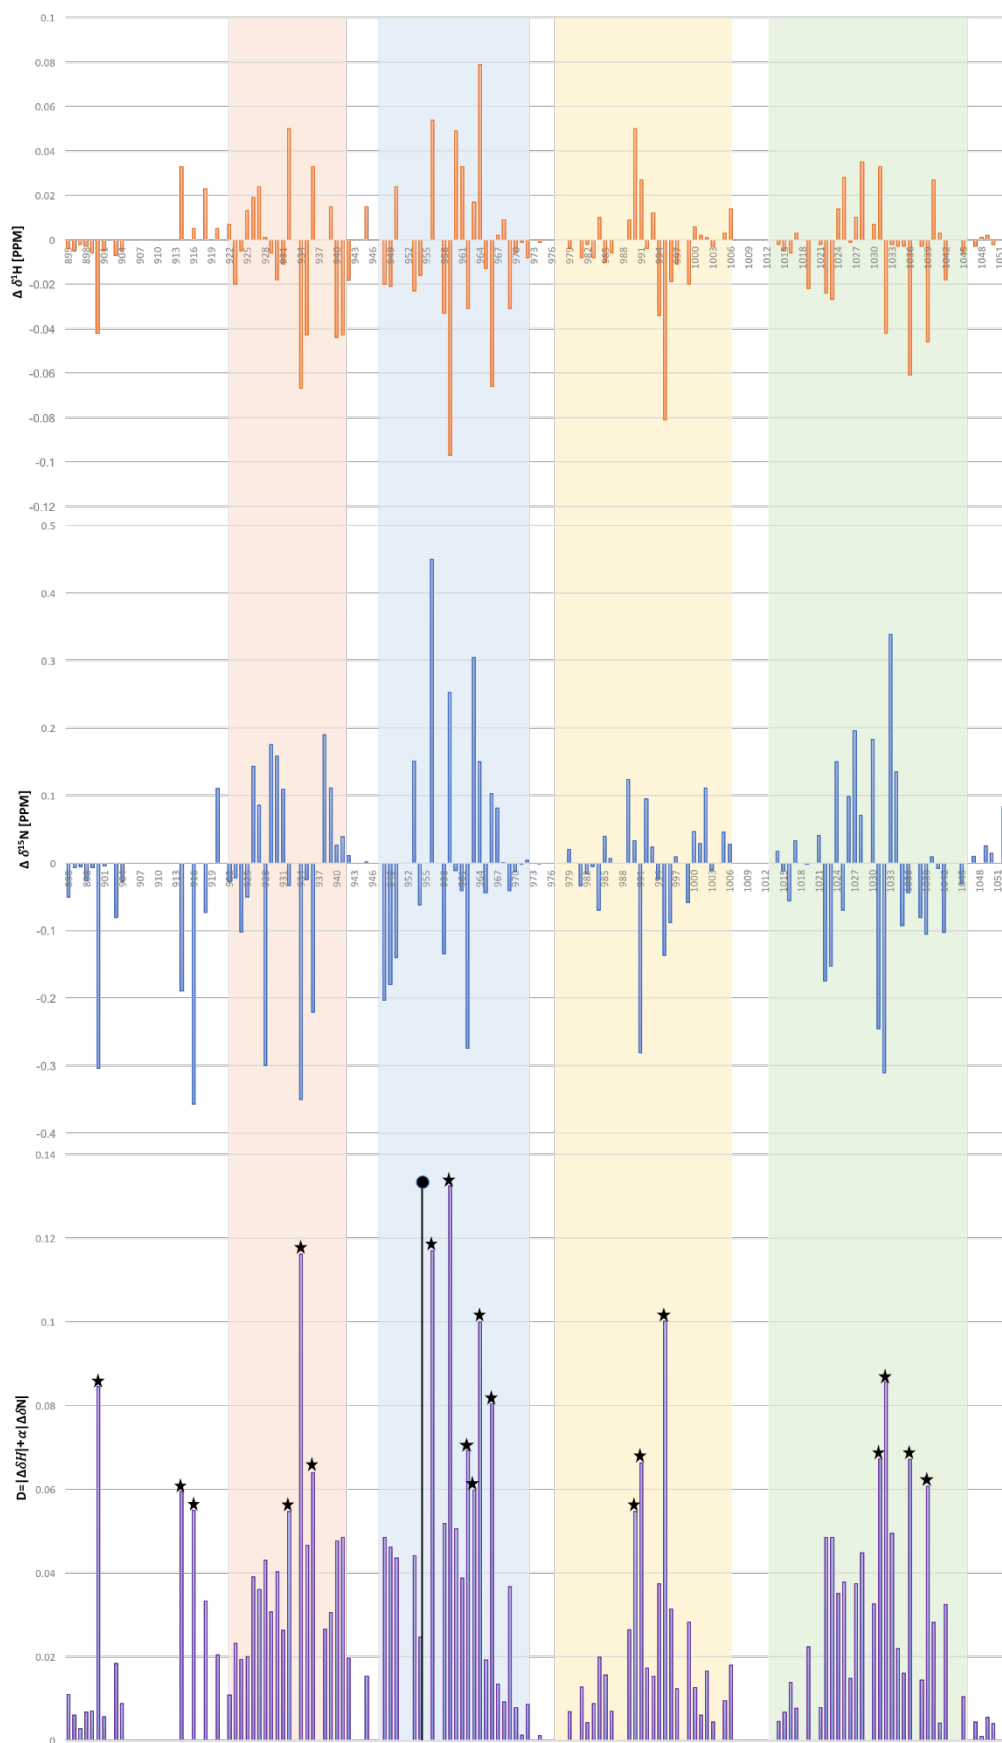

**Supplementary Figure 5.8: Chemical shift changes in FAT induced by LPP peptide.** Chemical shift differences in ppm were calculated for  $^1\text{H}$  (top panel),  $^{15}\text{N}$  (middle panel) and the weighted combined  $^1\text{H},^{15}\text{N}$  (lower panel) chemical shift perturbation of FAT in the presence of a four times molar excess of LPP peptide. Resonances showing significant change (greater than  $2\sigma=0.055$ ) are marked by stars. Others that disappeared upon ID2 addition are marked by full black circles. The shaded areas represent the helices (orange for helix1, blue for helix2, yellow for helix3, green for helix4).

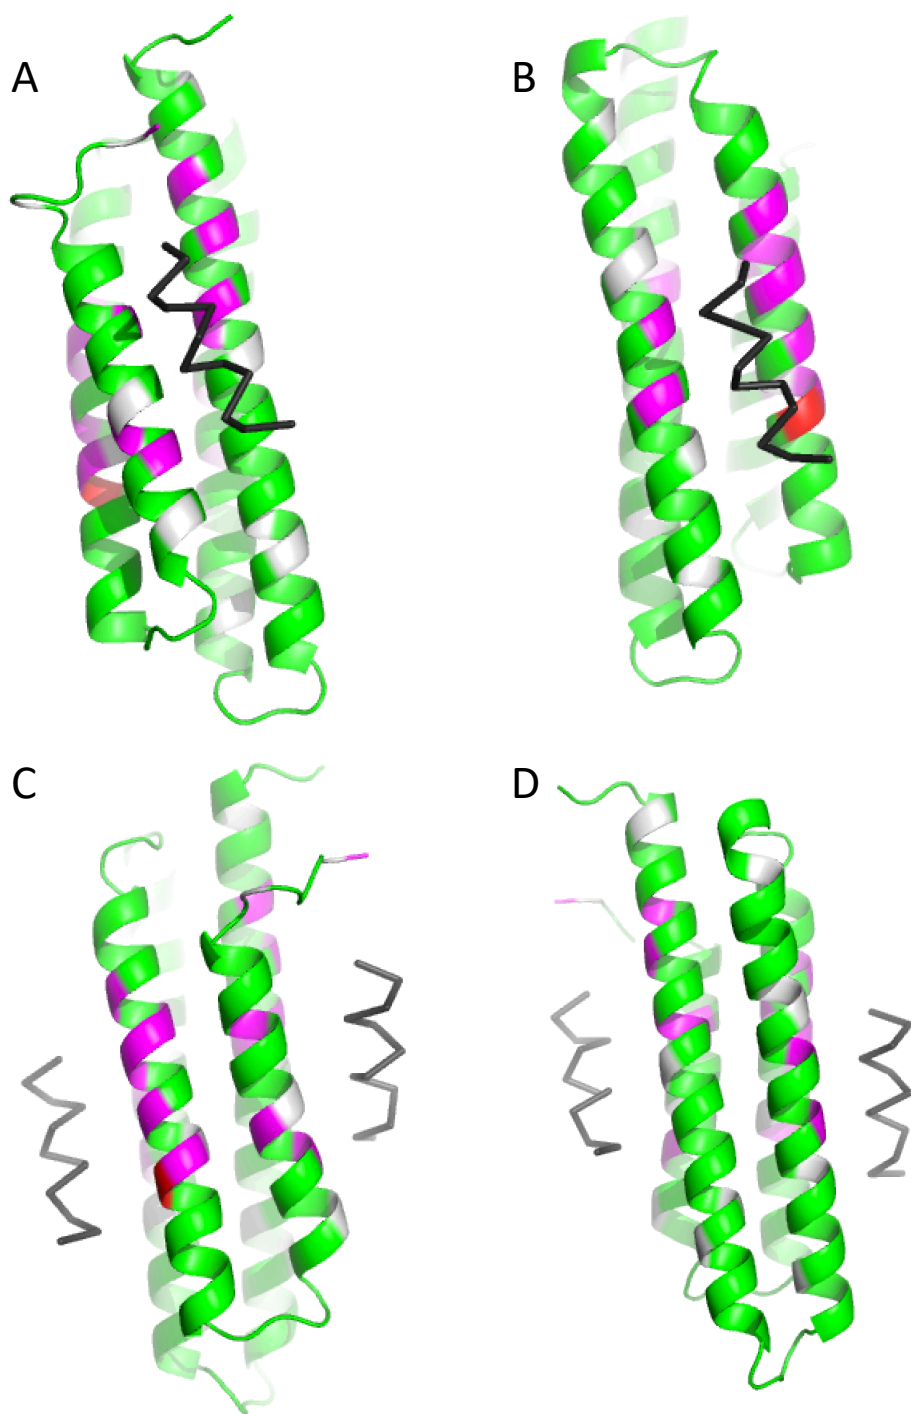

**Supplementary Figure 5.9: Mapping changes of NMR resonances on FAT structure upon titration with LPP** where A is the face of FAT helices 1 and 4, B is 2-3 helices, C is 1-2 helices and D is 3-4 helices. Resonances showing significant changes are labeled in black. LPP is represented as a ribbon. Others that disappeared are labeled in red. Gray residues represent amino acids whose peaks are not assigned. This figure was prepared using the PDB file 1OW7 and modified (Paxillin LD2 motif bound to 1-4 binding site and LD4 motif bound to 2-3 binding site on FAT of FAK).

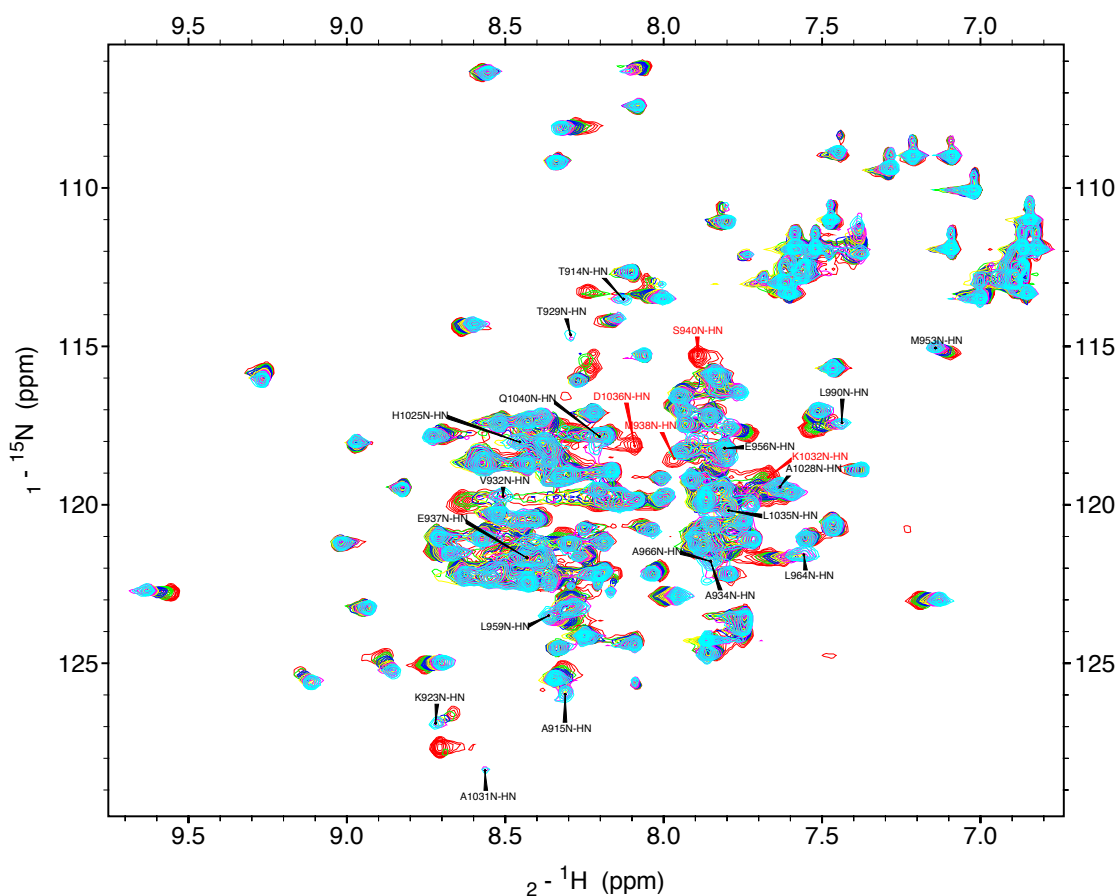

**Supplementary Figure 5.10: FAT/CD158 Titration.** Overlay of  $^1\text{H}$ - $^{15}\text{N}$ -HSQC spectra of 100  $\mu\text{M}$   $^{15}\text{N}$ -FAT in the absence (red) and presence of 0.5 (green), 1 (blue), 2 (yellow), 3 (magenta) and 4 (cyan) times molar excess of CD158 peptide. Resonances that disappeared upon CD158 addition are labelled in red. Resonances that significantly shifted  $>2\sigma = 0.092$  are labelled in black. All spectra were recorded at 25°C at a proton frequency of 950 MHz.

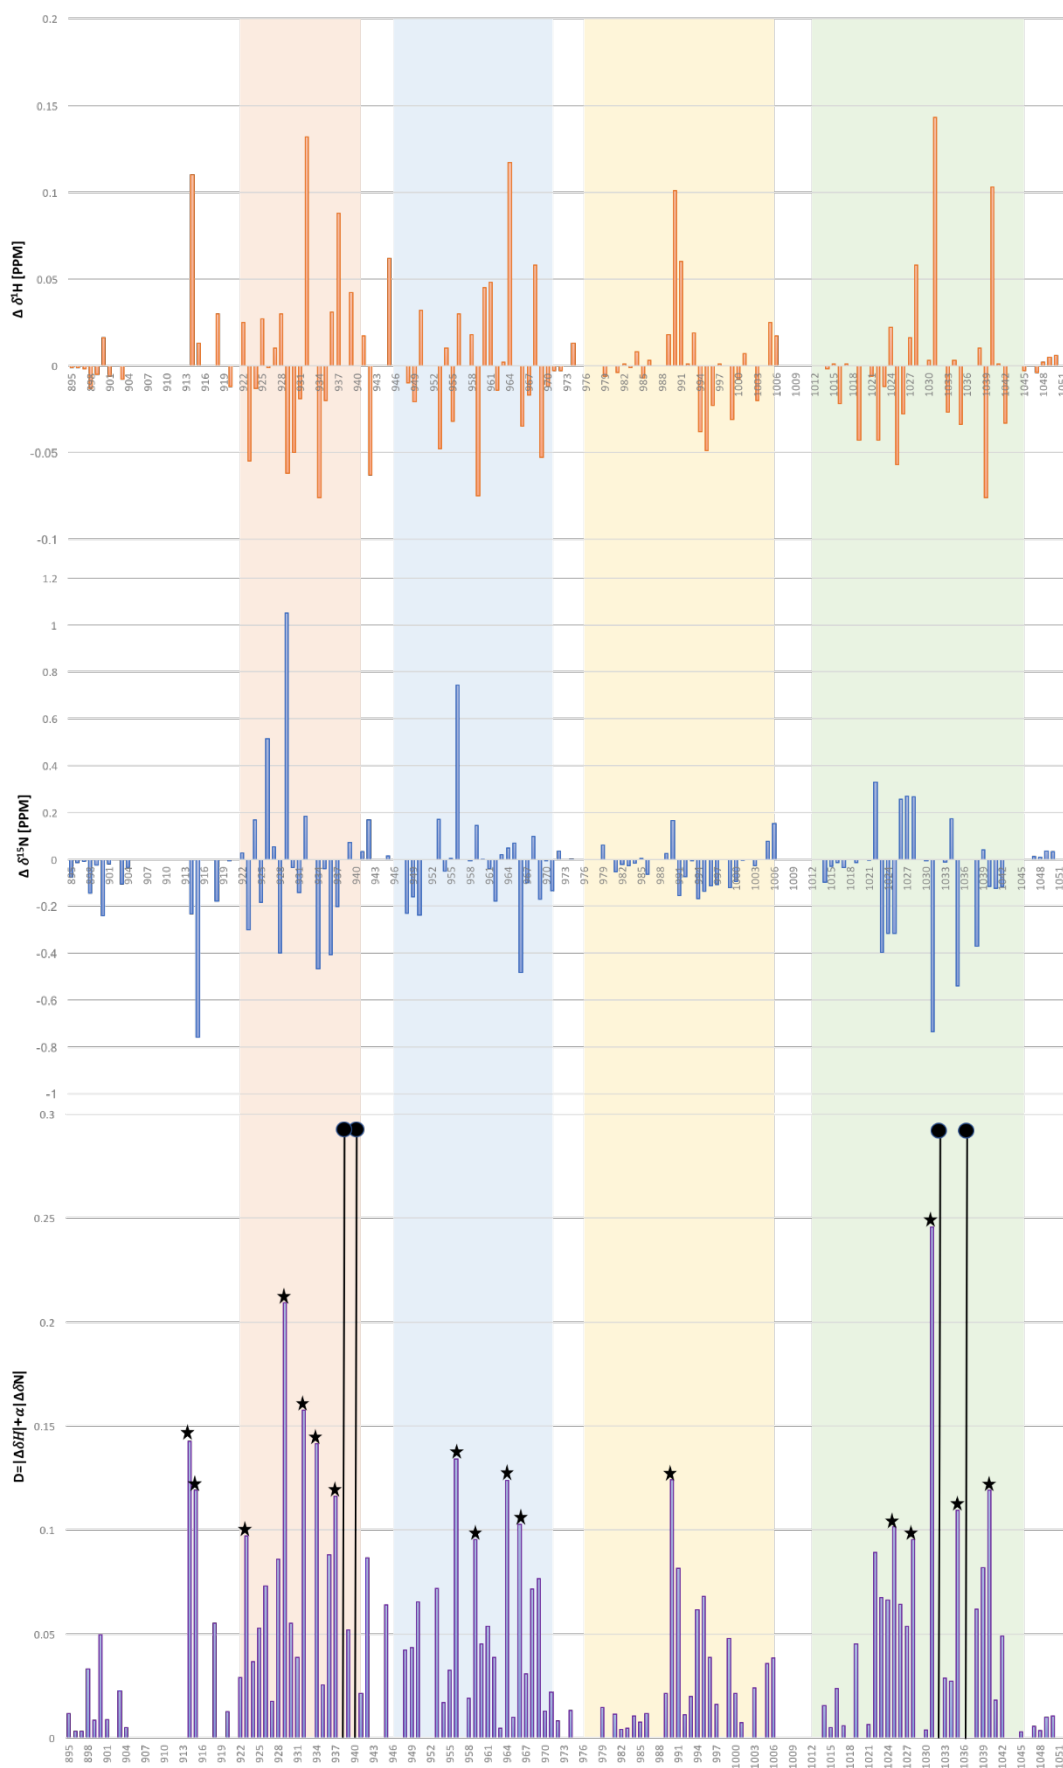

**Supplementary Figure 5.11: Chemical shift changes in FAT induced by CD158 peptide.** Chemical shift differences in ppm were calculated for  $^1\text{H}$  (top panel),  $^{15}\text{N}$  (middle panel) and the weighted combined  $^1\text{H}$ ,  $^{15}\text{N}$  (lower panel) chemical shift perturbation of FAT in the presence of a four times molar excess of CD158 peptide. Resonances showing significant change (greater than  $2\sigma = 0.092$ ) are marked by stars. Others that disappeared upon LD2 addition are marked by full black circles. The shaded areas represent the helices (orange for helix1, blue for helix2, yellow for helix3, green for helix4).

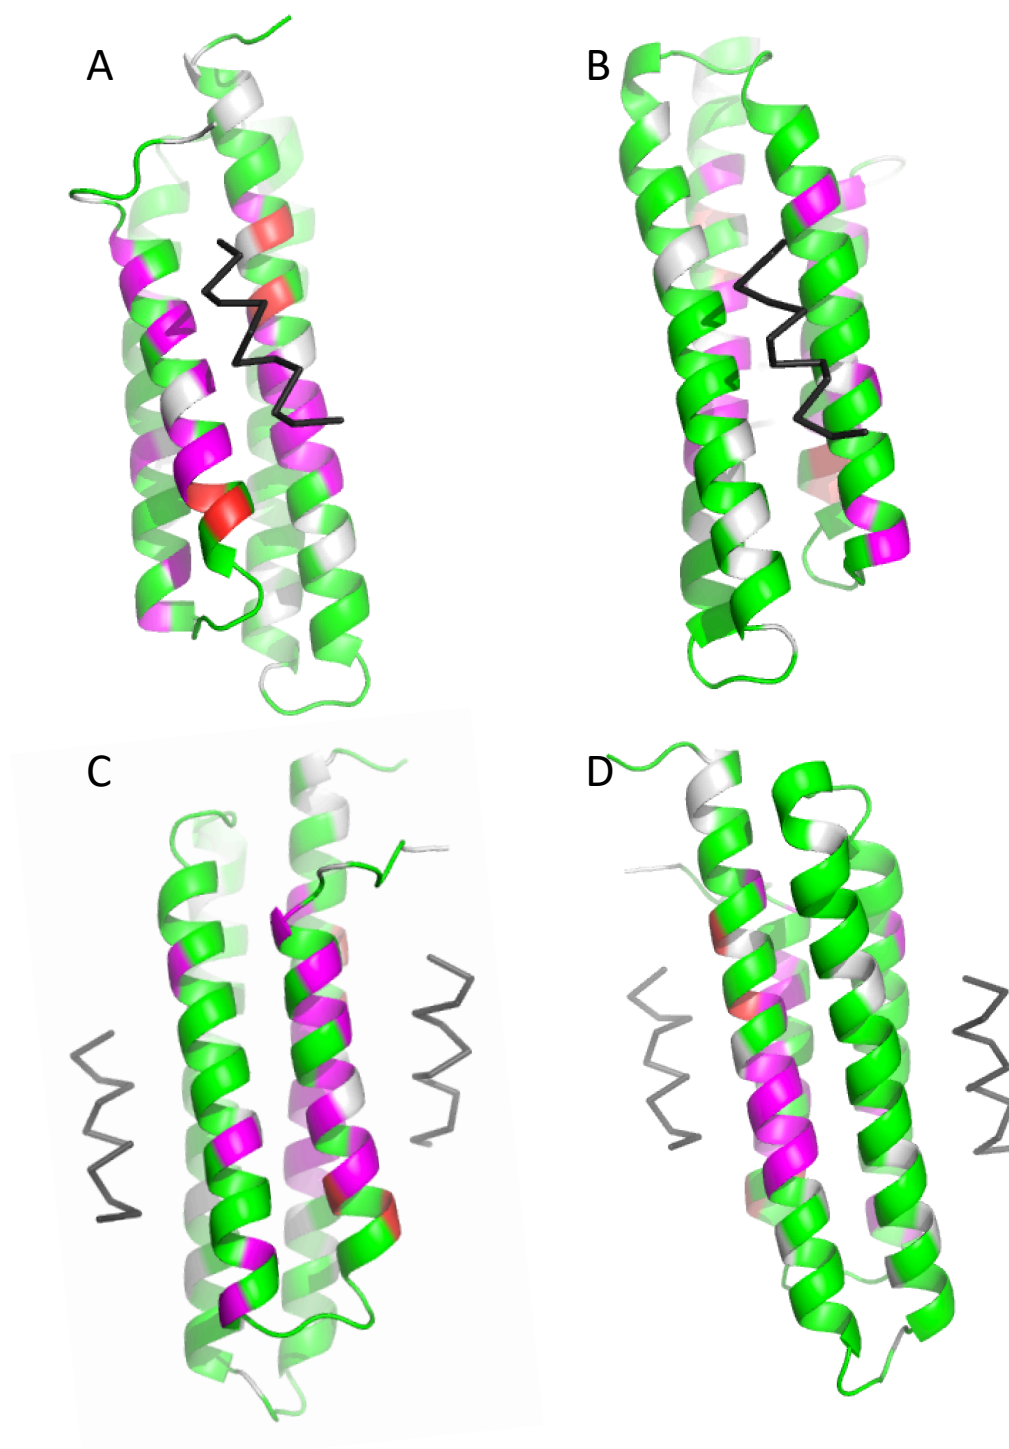

**Supplementary Figure 5.12: Mapping changes of NMR resonances on FAT structure upon titration with CD158** where A is the face of FAT helices 1 and 4, B is 2-3 helices, C is 1-2 helices and D is 3-4 helices. Resonances showing significant changes are labeled in magenta. CD158 is represented as a ribbon. Others that disappeared are labeled in red. Gray residues represent amino acids whose peaks are not assigned. This figure was prepared using the PDB file 1OW7 and modified (Paxillin LD2 motif bound to 1-4 binding site and LD4 motif bound to 2-3 binding site on FAT of FAK).

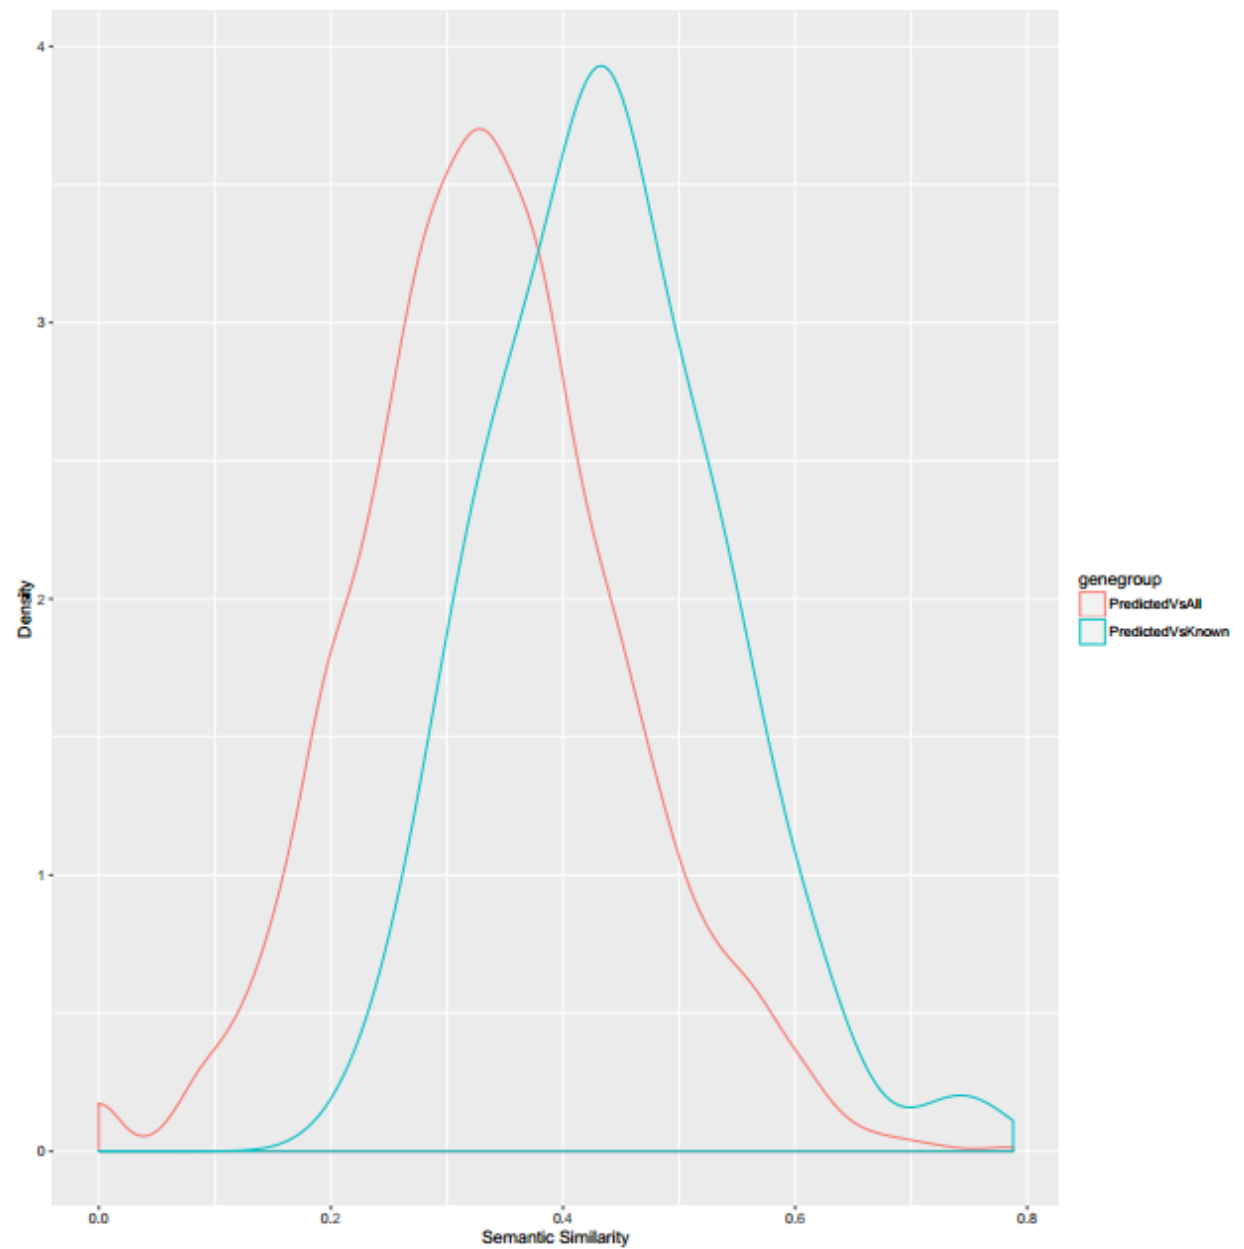

### Supplementary Figure 6:

**GO ANALYSIS:** Distribution of Semantic Similarity between LDMF-predicted proteins and known LD motif proteins (cyan) and between LDMF-predicted proteins and all proteins, except the known LD motif proteins (red). The p-value of Mann-Whitney U test for the distributions is  $6.32e-10$ .



**Conservation of human non-paxillin LD motif proteins across species.** The region encompassing the identified 10-residue LD motifs in humans are boxed.

SPPASIPPPAGSPLTQNAAQOLDRL LASLTENLIDFTDPTPQSAMVANGV-  
ETLMLITPADSGSVLK EATDELDALLASLTENLIDHTV-APQVSSTSMITP  
ETLMLITPADSGSVLK EATDELDALLASLTENLIDHTV-APQVSSTSMITP  
LTPVHGTAA DSASVLKDATDEL DALLLSLTENLM DHTV-TPQVSSPSMITP  
LI SAN VAPAEEAAVSK SAPDORDVSL TSLTENLIDFTEATPRVSSQPTIT-

. : . \* : \* \* \*\* \*\* \* : \* : :

IKGPEKLTLEERRSSLDAEIDSLTSLADLESSSPYKPRQTQNSASPAATG  
VNPGGKLTLEERRSSLDAEIDSLTSLADLESSSPYKPRIQQSGTSSAA  
GNPGGKLTLEERRSSLDAEIDSLTSLADLECSSPYKPRPPQGSASSIASP  
GNPGGKLTLEERRSSLDAEIDSLTSLADLECSSPYKPRPPQSSTGSTASP  
GNPRGKLTLEERRSSLDAEIDSLTSLADLECSSPYKPRPPQSSTGSTASP

L R H R P A G V L P L A K D M A P D L D Q L D D M L A Y I G H T S P E C V P P T V T Q L N A P S S S  
 A K R R C R E V I P N W D S L Q D G E D S L D E M L Q Y L G Y S S P E C L Q R T G A P L N I P A P P  
 Q F K R F R E T V P T W D T I R D E E D V L D E L L Q Y L G V T S P E C L Q R T G I S L N I P A P Q  
 Q F K R F R E T V P T W D T I R D E E D V L D E L L Q Y L G V T S P E C L Q R T G I S L N I P A P Q  
 Q L R R F R E T V P T W S T I R E E E D V L D E L L Q Y L G T T S P E C L Q R T G I S L N V P A P Q  
 . \* . \* . : \* \* \* . \* \* \* . \* \* \* \* \* . \* \* \* :

----YNFTDPSKVIIPKNDKDIQQEDIKLLMELESFSQTIEDGQKYNSSRGNDV  
 LCGSQAGVSK----GEQMCKIDKDEIDKLLLDLEHFSQKMESTFRESPKKESEF  
 KVS<sup>K</sup>FEEDQ----RDFTNSSSQEEDKLLMDLESFSQKMETSLREPLAKGKNS  
 KVS<sup>K</sup>FEEDQ----RDFTNSSSQEEDKLLMDLESFSQKMETSLREPLAKGKNS  
 EVPTTLELRDQ----RHFMPNPSQEEIDKLLMDLESFSQKMETSLGEPLARGKSI

SGYLSFPVCRKSCFQEDLNSDPNNLQLDLKOTFCDEHSMKMSNKNDTNECE-  
 ASCVPHMTSKPGILKEEPLRLKRIQLQLSSDS-EIPSVVLSKNDSDGGRV  
 TSFLSHHSIKTNTPKEDPTRDLKQLLQELRTVINNEEPAMALSKTEEDGRT-  
 ASFLSHHSIKANTLKEDPTRDLKQLLQELRSVINNEEPAVSLSKTEEDGRT-  
 ASFLSHHSIKANTLKEDPTRDLKQLLQELRSMINNEEPAVSLSKTEEDGRT-  
 : : : : \* : \* : : : \* : : : \* : :

MADDLDQLLDEVESRF CGQSAPRQ R NKGAGERV ---  
MAEDLDELLDEVESK FCTPDLLRRG --- MVEQPKGC  
MAEDLDELLDEVESK FCTPDLLRRG --- MVEQPKGC  
MAKDLELLDEVET KFCRLDPLRLD --- LGERPKGD

\* \*   \* \* \* \* . \* \* \*   \*   \*

## NCOA2

AAI63724.1\_danio\_rerio  
sp|Q15596|NCOA2\_HUMAN  
PNI56205.1\_chimpanzees  
BAF69036.1\_mouse

```
TGIKTEKTDGGYD---RVEPSSELDLDDLQNSQ-PGLFTDSRPVSLPSAVDK
----TEKEEMSFEPGDQPGSELNLEEILDDLQNSQLPQLFPDTRPGAPAGSVD-
----TEKEEMSFEPGDQPGSELNLEEILDDLQNSQLPQLFPDTRPGAPAGSVD-
----TVKEEVSFEPDQPGSELNLEEILDDLQNSQLPQLFPDTRPGAPTGSVD-
* * : : : * * : : : * * : : *
```

## NCOA3

XP\_692938.5\_danio\_rerio  
sp|Q9Y6Q9|NCOA3\_HUMAN  
PNI59688.1\_chimpanzees  
XP\_021041194.1\_mouse

```
TSSSSNQESKVKL---EQPDELESLESLGGLRNP GPMFVDSGSGGSEVGNK---
----QEKDPKIKTETSEEGSGDLNLDAILGDLTSSDFYN-NSISSNGSHLGTQK--
----QEKDPKIKTETSEEGSGDLNLDAILGDLTSSDFYN-NSISSNGSHLGTQK--
----QEKDPKIKTETSEEVSGDLNLDAILGDLTSSDFYN-NPT--NGSHPGAKQQM
. . . : * * * : : * * : : * * : : *
```

## CAST

XP\_007891289.1\_shark  
sp|P20810|ICAL\_HUMAN  
tr|K7DU47|K7DU47\_PANTR\_chimpanzees  
sp|P51125|ICAL\_MOUSE  
ABP68381.1\_chicken

```
AAFSVSA SQPAPKGTGD-MGALDALSDML-QPEAPVHSGPKYTGPVEVKEKA
PAVPVESKPDKPSGKSGM-DAALDDLIDTLGGPEETEENTTYTGPEVSDP-
PAVPVESKPDKPSGKSGM-DAALDDLIDTLGGPEETEENTTYTGPEVSDP-
PASPVQSTPSKPSDKSGM-DAALDDLIDTLGHEDTNRDDPPYTGPVVLDP-
-VASMAAADKPNSEPMDESALDSLIDTLGSEEDVATRPVYTGPTEITEN-
. : : * : : * * * * * * * * * * *
```

## CREB3

XP\_009678890.1\_ostrich  
sp|Q61817.2|CREB3\_MOUSE  
sp|O43889|CREB3\_HUMAN  
XP\_003829889.1\_chimpanzees

```
EESLLLEDWGLSD---AQLLNKEMDDFISLLSPFVDEPGTLQGYSPDSDS
--VKASLDLELSPSENSVQELSDWEVDLLSLLSPSVSDVLGSSSSSILHD-
EAVRAPLDWALPL----SEVPSDWEVDLLCSLLSPASLNILSSSNPCLVHHD
EAVRAPLDWELPL----SEVPSDWEVDLLCSLLSPASLNILSSSNPCLVHHD
* * : : : * * : : * * * * * * * * *
```

## RALGAP2

BAA92774.1\_mouse  
XP\_023168385.1\_drosophila  
sp|Q2PPJ7|RGPA2\_HUMAN  
PNI39515.1\_chimpanzees  
XP\_005158962.1\_danio\_rerio

```
-QLRRFRETVPWTSTIQEEDVLDELLQYLGTTSPECLQRTGISLNVPAQ
LRHR-PPGVLP LAKDVAPDLQ LDDMLAYIGHTSPECVPPTISELNAPSLS
-WHRDTFGPQKDSSQVEEGDVLDKLLENIGHTSPECLLPSQLNLNEPSLT
-WHRDTFGPQKDSSQVEEGDVLDKLLENIGHTSPECLLPSQLNLNEPSLP
-RSSVRFSEKCSSELDVEDGVLDQLLEDLGSSPECLPEPQLRLTQPPS-
: * * * * * * * * * * * * * * *
```

## C16orf71

NP\_001258515.1\_mouse  
C16orf71\_human  
PNI44266.1\_chimpanzees

```
-----SLKQLESWLDYILQSLPGRQDSQGNSASRSAWWLADR
PLVEPPEGPPVLSLQQLQSLAGQEDNQGNRAPGTVWVAADH
-----SLQQLQSLAGQEDNQGNRAPGTVWVAAD-
* * * * * * * * * * * * * * *
```

## RoXaN

sp|Q9UGR2|Z3H7B\_HUMAN  
XP\_009436757.1\_chimpanzees  
NP\_001074485.1\_mouse  
KF061317.1\_chicken  
XP\_007907761.1\_shark

```
RTLPSDLSDDFSDGDFVGP ELDTL LDSL SVQGGLSGSGVPS ELPQLIP----
RTLPSDLSDDFSDGDFVGP ELDTL LDSL SVQGGLSGSGVPS ELPQLIP----
RTLPGTEGLDDFSDGDFVGP ELDTL LDSL SVQGGLP GSGMPSEL PQLIP----
VPLPVPENVEDFTDGIIEGELDSLDSLAE GS-PYPLGTIPTNLPT EMPQ---
VLSVPESTEEFTDGEIIEGIDTL LDSIQD-----YPMSSAPGIPTNVPANVS
* : : * * * * * * * * * * * * * * *
```

## DLC1

XP\_007889463.1\_shark  
sp|Q96QB1|RHG07\_HUMAN  
XP\_016814601.1\_chimpanzees  
XP\_021074615.1\_mouse

```
GSHLYASTGDL LDKEDIFPHLDDILQHVNGLQQIVDHWKKNVLPQLQD
GSILYSSSGDLADLENE DIFPELDDILYHVKGMRIVNQWSEKFSDEGDS
GSILYSSSGDLADLENE DIFPELDDILYHVKGMRIVNQWSEKFSDEGDS
GSILYSSSGELADLENE DIFPELDDILYHVKGMRIVNQWSEKFSDEGDS
* * * * * * * * * * * * * * *
```

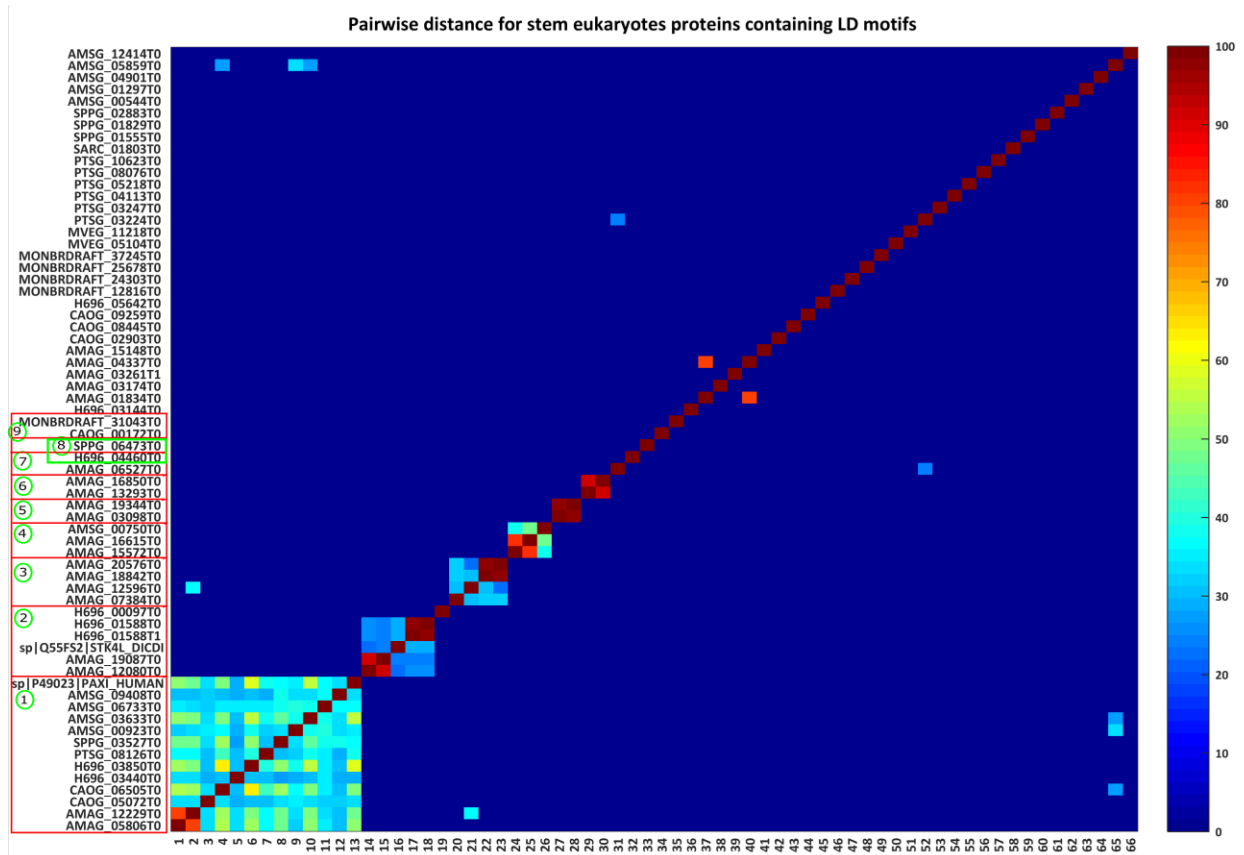

## Supplementary Figure 8:

**Unicellular Homology:** The conservation of LD motif-containing proteins in unicellular eukaryotes. Heat map shows pairwise identity matrix (in percentage) where  $E\text{-value} < 1e-10$ . Proteins with annotated domains from PFAM are clustered on the sequence labels (on Y-axis) as follow: (1) LIM domain, (2) Protein kinase domain, (3) Formin Homology 2, (4) Retinal Maintenance, (5) Ubiquitin- activating enzyme active site (Thif family), (6) Mitochondrial carrier protein, (7) Ankyrin repeat, (8) RasGEF domain (RhoGEF), and (9) Ras association (RalGDS/AF-6) domain. The Y-axis shows the gene names. Each gene starts with the abbreviation of the species coming from. Abbreviaions are as follows (1) P49023: *Homo sapiens*, (2) CAOG: *Capsaspora owczarzakii*, (3) MONBRDRAFT: *Monosiga brevicollis*, (4) MVEG: *Mortierella verticillata*, (5) Q55FS2: *Dictyostelium discoideum*, (6) SARC: *Sphaeroforma arctica*, (7) PTSG: *Salpingoeca rosetta*, (8) SPPG: *Spizellomyces punctatus*, (9) H696: *Fonticula alba*, (10) AMSG: *Thecamonas trahens*, and (11) AMAG: *Allomyces macrogynus*.

### Supplementary Table 1: Results of predictions from final model

Prediction results of the final LDMF model using different combination of features

| Features            | Number of Features | Sensitivity (%) | Specificity (%) | Accuracy (%) |
|---------------------|--------------------|-----------------|-----------------|--------------|
| All                 | 40                 | 88.889          | 100.00          | 99.968       |
| Sequence            | 5                  | 83.333          | 99.968          | 99.921       |
| Secondary Structure | 5                  | 94.444          | 80.251          | 80.292       |
| AAindex             | 30                 | 66.667          | 97.143          | 97.056       |

## Supplementary Table 2: Round1-round2\_predictions

The LD motif sequences used in LDMF are given, according to: *bona fide* LD motifs used in the initial training of LDMF, and LD motif candidates predicted in the second round of LDMF.

| Index                                                 | Protein name                                                             | Start position | End position |
|-------------------------------------------------------|--------------------------------------------------------------------------|----------------|--------------|
| 1.                                                    | Paxillin   PXN                                                           | 3              | 12           |
| Primary and secondary sequence                        |                                                                          |                |              |
| -----MDDLADLESTTSHISKRPVFLSEETPYS                     |                                                                          |                |              |
| -----CCHHHHHHHHHHCCCCCCCCCCCCCCCC                     |                                                                          |                |              |
| 2.                                                    | Paxillin   PXN                                                           | 144            | 153          |
| Primary and secondary sequence                        |                                                                          |                |              |
| OKSAEPSPTVMSTSLGSNLSELDRLLELNAVQHNPPGFPADEANSSPPL     |                                                                          |                |              |
| CCCCCCCCCCCCCCCCCHHHHHHHHHHHCCCCCCCCCCCCCCCCCCCC      |                                                                          |                |              |
| 3.                                                    | Paxillin   PXN                                                           | 216            | 225          |
| Primary and secondary sequence                        |                                                                          |                |              |
| PLTKEKPKRNGRGLEDVRPSVESLLDELESSVPSPVPAITVNOGEMSSP     |                                                                          |                |              |
| CCCCCCCCCCCCCCCCCHHHHHHHHHHHCCCCCCCCCCCCCCCCCCCC      |                                                                          |                |              |
| 4.                                                    | Paxillin   PXN                                                           | 265            | 274          |
| Primary and secondary sequence                        |                                                                          |                |              |
| PQRVTSTQQTRISASSATRELDLMASLSDFKIQGLEQRADGERCWAAG      |                                                                          |                |              |
| CCCCCCCCCCCCCCCCCHHHHHHHHHHHCCCCCCCCCCCCCCCCCCCC      |                                                                          |                |              |
| 5.                                                    | Paxillin   PXN                                                           | 333            | 342          |
| Primary and secondary sequence                        |                                                                          |                |              |
| MAQGKTGSSSPGPGPKPSQLDSMLGSLQSDLNKLG VATVAKGVC GACK    |                                                                          |                |              |
| CCCCCCCCCCCCCCCCCHHHHHHHHHHHHHCCCCCCCCCCCCCCCC        |                                                                          |                |              |
| 6.                                                    | Leupaxin   LPXN                                                          | 3              | 12           |
| Primary and secondary sequence                        |                                                                          |                |              |
| -----MEELDALLELERSTLQDSDEYSNPAPLPLDQ                  |                                                                          |                |              |
| -----CCHHHHHHHHHHHCCCCCCCCCCCCCCCCCCCC                |                                                                          |                |              |
| 7.                                                    | Leupaxin   LPXN                                                          | 92             | 101          |
| Primary and secondary sequence                        |                                                                          |                |              |
| YSEAQEPKESPPPSKTAAAQLDELMALHTEMQAKVAVRADAGKKHLPDK     |                                                                          |                |              |
| CCCCCCCCCCCCCCCCCHHHHHHHHHHHHHHHHHHHHHCCCCCCCCCCCC    |                                                                          |                |              |
| 8.                                                    | Leupaxin   LPXN                                                          | 127            | 136          |
| Primary and secondary sequence                        |                                                                          |                |              |
| VAVRADAGKKHLPDKQDHKASLDSMLGGLEQELQDLGIATVPKGHCASCQ    |                                                                          |                |              |
| HCCCCCCCCCCCCCCCCCHHCCCCCHHCCCCCHHHHHHHHHCCCCCCCCCCCC |                                                                          |                |              |
| 9.                                                    | Paxillin-B   paxB                                                        | 10             | 19           |
| Primary and secondary sequence                        |                                                                          |                |              |
| -----MATKGLNMDLDDLADLGRPKSSIKVTATVQTATPSS             |                                                                          |                |              |
| -----CCCCCCHHHHHHHHHHHCCCCCCCCCCCCCCCCCCCCCCCC        |                                                                          |                |              |
| 10.                                                   | Paxillin-B   paxB                                                        | 108            | 117          |
| Primary and secondary sequence                        |                                                                          |                |              |
| VSSQPAPQPQQSQIDGLDDLDELMESLNTSISTALKAVPTTPEEHITH      |                                                                          |                |              |
| CCCCCCCCCCCCCCCCCHHHHHHHHHHHHHCCCCCCCCCCCCCCCCCCCC    |                                                                          |                |              |
| 11.                                                   | Paxillin-B   paxB                                                        | 231            | 240          |
| Primary and secondary sequence                        |                                                                          |                |              |
| SQSQPQPYKVTATNSQSSDDLDELLKGLSPSTTTTTTVPPPVRDQHQH      |                                                                          |                |              |
| CCCCCCCCCCCCCCCCCHHHHHHHHHHHCCCCCCCCCCCCCCCCCCCC      |                                                                          |                |              |
| 12.                                                   | Paxillin-B   paxB                                                        | 310            | 319          |
| Primary and secondary sequence                        |                                                                          |                |              |
| NTPNNNNNNNTNSPKVVHGGDDLNNLNNLTSQVKDIDSTGPTSRGTGGC     |                                                                          |                |              |
| CCCCCCCCCCCCCCCCCHHHHHHHHHHHHHHHHHHHHHCCCCCCCCCCCC    |                                                                          |                |              |
| 13.                                                   | Transforming growth factor beta-1-induced transcript 1 protein   TGFB1I1 | 3              | 12           |
| Primary and secondary sequence                        |                                                                          |                |              |
| -----MEDLDALLSDLETTTSHMPRSGAPKERPAEPL                 |                                                                          |                |              |
| -----CCHHHHHHHHHCCCCCCCCCCCCCCCCCCCC                  |                                                                          |                |              |
| 14.                                                   | Transforming growth factor beta-1-induced transcript 1 protein   TGFB1I1 | 92             | 101          |
| Primary and secondary sequence                        |                                                                          |                |              |
| AAPAAPPFSSSGVLGTGLCELDRLQLNATQFNITDEIMSQFPSSKVA       |                                                                          |                |              |
| CCCCCCCCCCCCCCCCCHHHHHHHHHHHHHHHCCCCCCCCCCCCCCCC      |                                                                          |                |              |
| 15.                                                   | Transforming growth factor beta-1-induced transcript 1 protein   TGFB1I1 | 157            | 166          |
| Primary and secondary sequence                        |                                                                          |                |              |
| SLPSSSPGLPKASATSATLELDRLMASLSDFRVQNHLPASGPTQPPVVS     |                                                                          |                |              |
| CCCCCCCCCCCCCCCCCHHHHHHHHHHHCCCCCHHHCCCCCCCCCCCC      |                                                                          |                |              |
| 16.                                                   | Transforming growth factor beta-1-induced transcript 1 protein   TGFB1I1 | 203            | 212          |
| Primary and secondary sequence                        |                                                                          |                |              |
| PVVSSTNEGSPSPPEPTGKGLDMLGLLQSDLSRRGVPTQAKGLCGSCN      |                                                                          |                |              |
| CCCCCCCCCCCCCCCCCHHHHHHHHHHHHHCCCCCCCCCCCCCCCC        |                                                                          |                |              |
| 17.                                                   | Zinc finger CCCH domain-containing protein 7B   ZC3H7B                   | 280            | 289          |
| Primary and secondary sequence                        |                                                                          |                |              |
| RTLPSSTDLSLDFSDGDVFGPELDTLLDSLVLVQGGLSGSGVPSELPLQIP   |                                                                          |                |              |
| CCCCCCCCCCCCCCCCCHHHHHHHHHHHHHCCCCCCCCCCCCCCCC        |                                                                          |                |              |
| 18.                                                   | Rho GTPase-activating protein 7   Dlc1                                   | 905            | 914          |
| Primary and secondary sequence                        |                                                                          |                |              |
| SILYSSSGELADLENEDIPELDDILYHVKGMRIVNQWSEKFSDEGDSD      |                                                                          |                |              |
| CCCCCCCCCCCCCCCCCHHHHHHHHHHHHHHHHHHHHHHHCCCCCCCC      |                                                                          |                |              |

Supplementary Table 2.a: Information for the *bona fide* LD motifs.

| Index                                              | Protein name                                                                   | Start position | End position |
|----------------------------------------------------|--------------------------------------------------------------------------------|----------------|--------------|
| 1.                                                 | Band 4.1-like protein 5   EPB41L5                                              | 634            | 643          |
| <b>Primary and secondary sequence</b>              |                                                                                |                |              |
| ETLMITPADSGSVLKEATDELDALLASLTENLIDHTVAPQVSSTSMITP  |                                                                                |                |              |
| HHHHCCCCCCCCCCCCCHHHHHHHHHHHHHCCCCCCCCCCCCCCCC     |                                                                                |                |              |
| 2.                                                 | Insulin-like growth factor-binding protein 2   IGFBP2                          | 230            | 239          |
| <b>Primary and secondary sequence</b>              |                                                                                |                |              |
| LGLEPKKLRPPPARTPCQELDQVLERISTMRLPDERGPLEHLYSLHIP   |                                                                                |                |              |
| CCCCCCCCCCCCCCCCCHHHHHHHHHHHHHCCCCCCCCCCCCCCCC     |                                                                                |                |              |
| 3.                                                 | Protein C8orf37   C8orf37                                                      | 4              | 13           |
| <b>Primary and secondary sequence</b>              |                                                                                |                |              |
| -----MAEDLDELLDEVESKFCTPDLLRRGMVEQPKGC             |                                                                                |                |              |
| -----CHHHHHHHHHHHHHCCCCCCCCCCCCCCCC                |                                                                                |                |              |
| 4.                                                 | RaI GTPase-activating protein subunit alpha-1   RALGAP1                        | 1680           | 1689         |
| <b>Primary and secondary sequence</b>              |                                                                                |                |              |
| QFKRFRETVPTWDTIRDEEDVLDLQYLGVTSPLELQRTGISLNIPAPQ   |                                                                                |                |              |
| CCCCCCCCCCCCCCCCCHHHHHHHHHHHHHCCCCCCCCCCCCCCCC     |                                                                                |                |              |
| 5.                                                 | Uncharacterized protein C16orf71   C16orf71                                    | 267            | 276          |
| <b>Primary and secondary sequence</b>              |                                                                                |                |              |
| PLVEPPEGPPVLSLQQLA WDLDDILQSLAQEDNQGNRAPGTVWAAADH  |                                                                                |                |              |
| CCCCCCCCCCCCCCCCCHHHHHHHHHHHHHCCCCCCCCCCCCCCCC     |                                                                                |                |              |
| 6.                                                 | Lipoma-preferred partner   LPP                                                 | 123            | 132          |
| <b>Primary and secondary sequence</b>              |                                                                                |                |              |
| GNPGGKTLERRSSLD A EIDSLTSLADLECSPYKPRPPQSSTGSTASP  |                                                                                |                |              |
| CCCCCCCCCCCCCCCCCHHHHHHHHHHHHHCCCCCCCCCCCCCCCC     |                                                                                |                |              |
| 7.                                                 | Pre-mRNA 3'-end-processing factor FIP1   FIP1L1                                | 5              | 14           |
| <b>Primary and secondary sequence</b>              |                                                                                |                |              |
| -----MSAGEVERLVSELGGTGGDEEEEWLYGGPWVDVH            |                                                                                |                |              |
| -----CCHHHHHHHHHHHHHCCCCCCCCCCCCCCCC               |                                                                                |                |              |
| 8.                                                 | Calpastatin   CAST                                                             | 156            | 165          |
| <b>Primary and secondary sequence</b>              |                                                                                |                |              |
| PAVPVESKPKPSGKSGMDAALDDLIDTLGGPEETEEENTTYTGPEVSDP  |                                                                                |                |              |
| CCCCCCCCCCCCCCCCCHHHHHHHHHHHHHCCCCCCCCCCCCCCCC     |                                                                                |                |              |
| 9.                                                 | Nuclear receptor coactivator 2   NCOA2                                         | 805            | 814          |
| <b>Primary and secondary sequence</b>              |                                                                                |                |              |
| KTEKEEMSFEPGDQPGSELNLEEILDDLQNSQLPQLFPDTRPGAPAGSV  |                                                                                |                |              |
| CCCCCCCCCCCCCCCCCHHHHHHHHHHHHHCCCCCCCCCCCCCCCC     |                                                                                |                |              |
| 10.                                                | Nuclear receptor coactivator 3   NCOA3                                         | 799            | 808          |
| <b>Primary and secondary sequence</b>              |                                                                                |                |              |
| QEKDPKIKTETSEEGSGDLNLDAILGDLTSSDFYNNSISSNGSHLGTKQ  |                                                                                |                |              |
| CCCCCCCCCCCCCCCCCHHHHHHHHHHHHHCCCCCCCCCCCCCCCC     |                                                                                |                |              |
| 11.                                                | WASP homolog-associated protein with actin, membranes and microtubules   WHAMM | 22             | 31           |
| <b>Primary and secondary sequence</b>              |                                                                                |                |              |
| VCESPAERPRDSLESFSCPGSMDEVLASLRHGRAPLRKVEVPAVRPPHAS |                                                                                |                |              |
| CCCCCCCCCCCCCCCCCHHHHHHHHHHHHHCCCCCCCCCCCCCCCC     |                                                                                |                |              |
| 12.                                                | RaI GTPase-activating protein subunit alpha-2   RALGAP2                        | 1519           | 1528         |
| <b>Primary and secondary sequence</b>              |                                                                                |                |              |
| WHRDTFGPQKDSSQVEEGDDVLDKLENNIGHTSPECLLPQLNLNEPSLT  |                                                                                |                |              |
| CCCCCCCCCCCCCCCCCHHHHHHHHHHHHHCCCCCCCCCCCCCCCC     |                                                                                |                |              |
| 13.                                                | Purkinje cell protein 2 homolog   PCP2                                         | 62             | 71           |
| <b>Primary and secondary sequence</b>              |                                                                                |                |              |
| RCSLQAGPGQTTKSQSDPTPEMDSLMDMLASTQGRRMDDQRTVSSLPGF  |                                                                                |                |              |
| CCCCCCCCCCCCCCCCCHHHHHHHHHHHHHCCCCCCCCCCCCCCCC     |                                                                                |                |              |

**Supplementary Table 2.b:** Information of the 13 predict LD motifs from round1 predicted by LDMF

| Index                                                                                                                         | Protein name                                                                             | Start position | End position |
|-------------------------------------------------------------------------------------------------------------------------------|------------------------------------------------------------------------------------------|----------------|--------------|
| 1.                                                                                                                            | Band 4.1-like protein 5   EPB41L5                                                        | 634            | 643          |
| <b>Primary and secondary sequence</b>                                                                                         |                                                                                          |                |              |
| ETLMLITPADSGSVLKEATDELDALLASLTENLIDHTVAPQVSSTSMITP<br>HHHHCCCCCCCCCCCCCHHHHHHHHHHHHHHHHHHHHHCCCCCCCCCCCCCCCC                  |                                                                                          |                |              |
| 2.                                                                                                                            | Serine/threonine-protein phosphatase 2A<br>regulatory subunit B" subunit alpha   PPP2R3A | 508            | 517          |
| <b>Primary and secondary sequence</b>                                                                                         |                                                                                          |                |              |
| KVSKEEGDQORDFTNSSSQEEIDKLLMDLESFSQKMETSLREPLAKGKNS<br>CCCCCCCCCCCCCCCCCHHHHHHHHHHHHHHHHHHHHHHHHHHHHHHHCCCCCCCCCCCC            |                                                                                          |                |              |
| 3.                                                                                                                            | Coiled-coil domain-containing protein 158  <br>CCDC158                                   | 903            | 912          |
| <b>Primary and secondary sequence</b>                                                                                         |                                                                                          |                |              |
| ASFLSHHSTKANTLKEDPTRDLKQLQELRSVINEEPAVLSKTEEDGRT<br>HHHHCCCCCCCCCCCCCHHHHHHHHHHHHHHHHHHHHHHHHHHHHHHHCCCCCCCCCCCCCCCC          |                                                                                          |                |              |
| 4.                                                                                                                            | Ral GTPase-activating protein subunit alpha-1  <br>RALGAP1                               | 1680           | 1689         |
| <b>Primary and secondary sequence</b>                                                                                         |                                                                                          |                |              |
| QFKRFRETVPWTDITRDEEDVLDELLQYLGVTSPCLQRTGISLNIPAPQ<br>CCCCCCCCCCCCCCCCCHHHHHHHHHHHHHHHHHHHHHHHHHHHHHHHCCCCCCCCCCCCCCCCCCCC     |                                                                                          |                |              |
| 5.                                                                                                                            | Uncharacterized protein C16orf71   C16orf71                                              | 267            | 276          |
| <b>Primary and secondary sequence</b>                                                                                         |                                                                                          |                |              |
| PLVEPPEGPPVLSLQQLA WDLDDILQSLAQEDNQGNRAPGTVWVAADH<br>CCCCCCCCCCCCCCCCCHHHHHHHHHHHHHHHHHHHHHHHHHHHHHHHCCCCCCCCCCCCCCCCCCCC     |                                                                                          |                |              |
| 6.                                                                                                                            | Lipoma-preferred partner   LPP                                                           | 123            | 132          |
| <b>Primary and secondary sequence</b>                                                                                         |                                                                                          |                |              |
| GNPGGKTLEERRSLDAEIDSLTSLADLECSSPYKPRPPQSSTGSTASP<br>CCCCCCCCCCCCCCCCCHHHHHHHHHHHHHHHHHHHHHHHHHHHHHHHCCCCCCCCCCCCCCCCCCCC      |                                                                                          |                |              |
| 7.                                                                                                                            | Cyclic AMP-responsive element-binding protein 3  <br>CREB3                               | 49             | 58           |
| <b>Primary and secondary sequence</b>                                                                                         |                                                                                          |                |              |
| EAVRAPLDWALPLSEVPSDWEVDDLCSLLSPPASLNILSSSNPCLVHHH<br>HHHHCCCCCCCCCCCCCCCCCHHHHHHHHHHHHHHHHHHHHHHHHHHHHHHHCCCCCCCCCCCCCCCCCCCC |                                                                                          |                |              |
| 8.                                                                                                                            | Calpastatin   CAST                                                                       | 156            | 165          |
| <b>Primary and secondary sequence</b>                                                                                         |                                                                                          |                |              |
| PAVPVESKPDKPSGKSGMDAALDDLIDTLGGPEETEEENTTYTGPEVSDP<br>CCCCCCCCCCCCCCCCCHHHHHHHHHHHHHHHHHHHHHHHHHHHHHHHCCCCCCCCCCCCCCCCCCCC    |                                                                                          |                |              |
| 9.                                                                                                                            | Nuclear receptor coactivator 2   NCOA2                                                   | 805            | 814          |
| <b>Primary and secondary sequence</b>                                                                                         |                                                                                          |                |              |
| KTEKEEMSFEPGDQPGSELDNLEEILDDLQNSQLPQLFPDTRPGAPAGSV<br>CCCCCCCCCCCCCCCCCHHHHHHHHHHHHHHHHHHHHHHHHHHHHHHHCCCCCCCCCCCCCCCCCCCC    |                                                                                          |                |              |
| 10.                                                                                                                           | Nuclear receptor coactivator 3   NCOA3                                                   | 799            | 808          |
| <b>Primary and secondary sequence</b>                                                                                         |                                                                                          |                |              |
| QEKDPKIKTETSEEGSGDLNLDAILGDLTSSDFYNNSSISNGSHLGTKQ<br>CCCCCCCCCCCCCCCCCHHHHHHHHHHHHHHHHHHHHHHHHHHHHHHHCCCCCCCCCCCCCCCCCCCC     |                                                                                          |                |              |
| 11.                                                                                                                           | Protein C8orf37   C8orf37                                                                | 4              | 13           |
| <b>Primary and secondary sequence</b>                                                                                         |                                                                                          |                |              |
| -----MAEDLDELLEVESKFCTPDLLRRGMVEQPKGC<br>-----CHHHHHHHHHHHHHHHHHHHHHHHHHHHHHHHHHHHHHHHHHCCCCCCCCCCCCCCCCCCCC                  |                                                                                          |                |              |
| 12.                                                                                                                           | Ral GTPase-activating protein subunit alpha-2  <br>RALGAP2                               | 1519           | 1528         |
| <b>Primary and secondary sequence</b>                                                                                         |                                                                                          |                |              |
| WHRDTFGPQKDSSQVEEGDDVLDKLENNIGHTSPECLLPQLNLNEPSLT<br>CCCCCCCCCCCCCCCCCHHHHHHHHHHHHHHHHHHHHHHHHHHHHHHHCCCCCCCCCCCCCCCCCCCC     |                                                                                          |                |              |

**Supplementary Table 2.c:** Information of the 12 new LD motifs finally suggested by LDMF.

## Supplementary Table 3: Computational Validation

Summary of the bioinformatic search for evidence supportive of interactions between known LD-motif binding proteins and the LDMF-predicted LD motif-containing proteins from the human proteome.

To allow straightforward reproducibility, gene names are given in the table. The corresponding protein names for the LDBD-containing proteins are XPO1: exportin; PABPC1: polyadenylate-binding protein 1 (PABP-1); VCL: vinculin; TLN1: talin; PARVA:  $\alpha$ -parvin; PARVB:  $\beta$ -parvin; PARVG:  $\gamma$ -parvin; PDCD10: programmed cell death protein 10/cerebral cavernous malformations 3 protein (CCM3); PTK2: focal adhesion kinase (FAK); PTK2B: Protein-tyrosine kinase 2 $\beta$  (PYK2); GIT1: Arf GTPase-activating protein/GRK-interacting protein 1 (GIT1); GIT2: Arf GTPase-activating protein/GRK-interacting protein 2 (GIT2); BCL2: Apoptosis regulator Bcl-2. The corresponding protein names for the predicted LD motif-containing proteins are EPB41L5: Band 4.1-like protein 5 (E41L5); LPP: lipoma-preferred partner (LPP); RALGAPA1: Ral GTPase-activating protein subunit  $\alpha$ -1 (RGPA1); PPP2R3a: Serine/threonine-protein phosphatase 2A regulatory subunit B' subunit  $\alpha$  (P2R3A); CCDC158: coiled-coil domain-containing protein 158 (CD158); C16orf71: uncharacterized protein C16orf71 (CP071); NCOA2: nuclear receptor coactivator 2 (NCOA2); NCOA3: nuclear receptor coactivator 3 (NCOA3); CAST: calpastatin (CAST); CREB3: cyclic AMP-responsive element-binding protein 3 (CREB3); RALGAPA2: Ral GTPase-activating protein subunit  $\alpha$ -2 (RGPA2); C8orf37: uncharacterized protein C8orf37 (CP037).

| Highly likely |             |        |               |              |                   |        |             |        |             |               |       |        |                    |
|---------------|-------------|--------|---------------|--------------|-------------------|--------|-------------|--------|-------------|---------------|-------|--------|--------------------|
| gene name     | XPO1        | PABPC1 | VCL           | TLN1         | PARVA             | PARVB  | PARVG       | PDCD10 | PTK2        | PTK2B         | GIT1  | GIT2   | BCL2               |
| EPB41L5       | 0.51        | -      | 0.78          | 0.99, Small* | 0.55              | Small* | 0.6, Small* | 0.67   | 0.99, Small | 1, Small*     | -     | Small  | 0.9                |
| LPP           | 0.98        | 0.019  | Medium, 0.011 | Small, 0.015 | 0.51, Large, 0.01 | Small* | Small*      | -      | Small       | Small*, 0.002 | 0.001 | Small  | 0.047              |
| RALGAPA1      | Small       | Small* | -             | -            | -                 | Small* | -           | -      | 0.76, Small | 1             | -     | Medium | Small              |
| PPP2R3A       | -           | Small* | Small         | -            | Small             | -      | Small*      | -      | Small       | Small*        | -     | -      | -                  |
| CCDC158       | Small*      | -      | -             | -            | -                 | -      | -           | -      | -           | -             | Small | -      | -                  |
| C16orf71      | -           | -      | -             | -            | -                 | -      | -           | -      | -           | -             | Small | -      | -                  |
| less likely   |             |        |               |              |                   |        |             |        |             |               |       |        |                    |
| gene name     | XPO1        | PABPC1 | VCL           | TLN1         | PARVA             | PARVB  | PARVG       | PDCD10 | PTK2        | PTK2B         | GIT1  | GIT2   | BCL2               |
| NCOA2         | Small       | -      | 0.041         | Small        | Small*            | -      | Small       | -      | -           | Small, 0.007  | 0.046 | Large  | Small, 0.015       |
| NCOA3         | 0.98, Small | Small  | -             | -            | Small*            | -      | -           | -      | -           | Small, 0.016  | -     | Small  | 0.77, Small, 0.026 |
| CAST          | -           | -      | Medium, 0.033 | Medium       | Small             | -      | -           | -      | -           | Small*, 0.007 | 0.036 | Small  | Small, 0.047       |
| CREB3         | -           | -      | Small         | Small        | Medium            | -      | Small*      | -      | 0.77        | 0.87, Small*  | Small | Small* | -                  |
| least likely  |             |        |               |              |                   |        |             |        |             |               |       |        |                    |
| gene name     | XPO1        | PABPC1 | VCL           | TLN1         | PARVA             | PARVB  | PARVG       | PDCD10 | PTK2        | PTK2B         | GIT1  | GIT2   | BCL2               |
| RALGAPA2      | -           | Small  | -             | Small        | Small*            | -      | Small       | -      | -           | 0.93, Small   | -     | Medium | Small              |
| C8orf37       | Small       | -      | -             | Small*       | -                 | -      | -           | Small  | Small       | -             | -     | -      | -                  |

Blue is probability score > 0.5 from PrePP1 tool.

Red is the Pearson correlation score from GeneFriends tool between 2 associated genes based on the idea of co-expression.

Small is in a range [0.1, 0.3]. Medium is in a range [0.3, 0.5]. Large is in a range [0.5, 1]. Star (\*) means negative correlation.

Green is the p-value < 0.05 from CoCiter tool.
